# Supplementary material for: Inventory of country-specific emissions of engineered nanomaterials throughout the life cycle
Source: Royal Society of Chemistry journal article supplement (doi:10.1039/d0en00422g), 2020-01-01
Supplement: d0en00422g1.pdf [file d0en00422g1.pdf]

## **Supplementary information**

### **Inventory of country-specific emissions of engineered nanomaterials throughout the life cycle**

Jeroen Kuenen<sup>1</sup>, Vicenç Pomar-Portillo<sup>2</sup>, Alejandro Vilchez<sup>2</sup>, Antoon Visschedijk<sup>1</sup>, Hugo Denier van der Gon<sup>1</sup>, Socorro Vázquez-Campos<sup>2</sup>, Bernd Nowack<sup>3</sup>, Véronique Adam<sup>3</sup>

<sup>1</sup> *TNO, Department of Climate, Air and Sustainability, Princetonlaan 6, 3584 CB Utrecht, The Netherlands*

<sup>2</sup> *LEITAT Technological Center, Materials Safety Unit, Human & Environmental Health & Safety Division, Carrer de la Innovació 2, 08225 Terrassa (Barcelona), Spain*

<sup>3</sup> *EMPA, Swiss Federal Laboratories for Materials Science and Technology, Lerchenfeldstrasse 5, 9014 St. Gallen, Switzerland*

## Country allocation of ENM production

Table S1: Nano-TiO<sub>2</sub> production percentages in European companies (C1 to C8). The countries that do not appear in the table do not produce nano-TiO<sub>2</sub>.

| Application and overall share of manufacturing (A)                                                                             |     | Sunscreens & Cosmetics (76%) |      |        |      | Others (24%) |      |        |        |        |      |      |
|--------------------------------------------------------------------------------------------------------------------------------|-----|------------------------------|------|--------|------|--------------|------|--------|--------|--------|------|------|
| Company                                                                                                                        |     | C1                           | C2   | C3     | C4   | C2           | C5   | C3     | C6     | C7     | C4   | C8   |
| Company production capacity at European level (B)                                                                              |     | High                         | High | Medium | Low  | High         | High | Medium | Medium | Medium | Low  | Low  |
| Company contribution to European production (C = B / number of companies at same level)                                        |     | 40%                          | 40%  | 15%    | 5%   | 40%          | 40%  | 5%     | 5%     | 5%     | 2.5% | 2.5% |
| Contribution of plants in country to company European production (D = number of plants in country / European number of plants) | BEL |                              |      |        |      |              |      |        | 33%    |        |      |      |
|                                                                                                                                | CZE |                              |      |        | 100% |              |      |        |        |        | 100% |      |
|                                                                                                                                | DEU |                              | 27%  |        |      | 27%          | 100% |        | 33%    |        |      |      |
|                                                                                                                                | ESP | 100%                         | 13%  |        |      | 13%          |      |        |        |        |      |      |
|                                                                                                                                | FIN |                              | 13%  |        |      | 13%          |      |        |        |        |      |      |
|                                                                                                                                | FRA |                              | 13%  |        |      | 13%          |      |        |        | 100%   |      |      |
|                                                                                                                                | GBR |                              | 13%  |        |      | 13%          |      |        |        |        |      |      |
|                                                                                                                                | ITA |                              | 13%  |        |      | 13%          |      |        |        |        |      |      |
|                                                                                                                                | NOR |                              |      |        |      |              |      |        | 33%    |        |      | 100% |
|                                                                                                                                | SVN |                              |      | 100%   |      |              |      | 100%   |        |        |      |      |
| Contribution of company to nano-ZnO production in country (A x C x D)                                                          | BEL |                              |      |        |      |              |      |        | 0.4%   |        |      |      |
|                                                                                                                                | CZE |                              |      |        | 4%   |              |      |        |        |        | 1%   |      |
|                                                                                                                                | DEU |                              | 8%   |        |      | 3%           | 10%  |        | 0.4%   |        |      |      |
|                                                                                                                                | ESP | 30%                          | 4%   |        |      | 1%           |      |        |        |        |      |      |
|                                                                                                                                | FIN |                              | 4%   |        |      | 1%           |      |        |        |        |      |      |
|                                                                                                                                | FRA |                              | 4%   |        |      | 1%           |      |        |        | 1%     |      |      |
|                                                                                                                                | GBR |                              | 4%   |        |      | 1%           |      |        |        |        |      |      |
|                                                                                                                                | ITA |                              | 4%   |        |      | 1%           |      |        |        |        |      |      |
|                                                                                                                                | NOR |                              |      |        |      |              |      |        | 0.4%   |        |      | 1%   |
|                                                                                                                                | SVN |                              |      | 11%    |      |              |      | 1%     |        |        |      |      |

Table S2: Nano-ZnO production percentages in European companies (C1 to C9). The countries that do not appear in the table do not produce nano-ZnO.

| Application and overall share of manufacturing (A)                                                                             |     | Sunscreens & Cosmetics (85%) |      |      |        |      | Others (15%) |        |        |        |      |      |
|--------------------------------------------------------------------------------------------------------------------------------|-----|------------------------------|------|------|--------|------|--------------|--------|--------|--------|------|------|
| Company                                                                                                                        |     | C1                           | C2   | C3   | C4     | C5   | C3           | C6     | C7     | C4     | C8   | C9   |
| Company production capacity at European level (B)                                                                              |     | High                         | High | High | Medium | Low  | High         | Medium | Medium | Medium | Low  | Low  |
| Company contribution to European production (C = B / number of companies at same level)                                        |     | 27%                          | 27%  | 27%  | 19%    | 1%   | 80%          | 6%     | 6%     | 6%     | 0.5% | 0.5% |
| Contribution of plants in country to company European production (D = number of plants in country / European number of plants) | BEL |                              |      | 33%  |        |      | 33%          |        |        |        |      |      |
|                                                                                                                                | CZE |                              |      |      |        |      |              |        |        |        |      | 100% |
|                                                                                                                                | DEU | 20%                          | 100% |      | 100%   |      |              | 100%   |        | 100%   |      |      |
|                                                                                                                                | ESP |                              |      |      |        |      |              |        |        |        | 100% |      |
|                                                                                                                                | FRA | 20%                          |      |      |        | 100% |              |        |        |        |      |      |
|                                                                                                                                | GBR | 20%                          |      |      |        |      |              |        | 100%   |        |      |      |
|                                                                                                                                | ITA | 20%                          |      |      |        |      |              |        |        |        |      |      |
|                                                                                                                                | NLD | 20%                          |      | 33%  |        |      | 33%          |        |        |        |      |      |
|                                                                                                                                | NOR |                              |      | 33%  |        |      | 33%          |        |        |        |      |      |
| Contribution of company to nano-ZnO production in country (A x C x D)                                                          | BEL |                              |      | 8%   |        |      | 4%           |        |        |        |      |      |
|                                                                                                                                | CZE |                              |      |      |        |      |              |        |        |        |      | 0.1% |
|                                                                                                                                | DEU | 4.5%                         | 23%  |      | 16%    |      |              | 1%     |        | 1%     |      |      |
|                                                                                                                                | ESP |                              |      |      |        |      |              |        |        |        | 0.1% |      |
|                                                                                                                                | FRA | 4.5%                         |      |      |        | 0.9% |              |        |        |        |      |      |
|                                                                                                                                | GBR | 4.5%                         |      |      |        |      |              |        | 1%     |        |      |      |
|                                                                                                                                | ITA | 4.5%                         |      |      |        |      |              |        |        |        |      |      |
|                                                                                                                                | NLD | 4.5%                         |      | 8%   |        |      | 4%           |        |        |        |      |      |
|                                                                                                                                | NOR |                              |      | 8%   |        |      | 4%           |        |        |        |      |      |

Table S3: Nano-Ag production percentages in European companies (C1 to C10). The countries that do not appear in the table do not produce nano-Ag.

| Application and overall share of | Printed electronics (80%) | Other applications (20%) |
|----------------------------------|---------------------------|--------------------------|
|----------------------------------|---------------------------|--------------------------|

| manufacturing (A)                                                                                                              |     |        |        |        |        |        |        |        |        |        |        |        |
|--------------------------------------------------------------------------------------------------------------------------------|-----|--------|--------|--------|--------|--------|--------|--------|--------|--------|--------|--------|
| Company                                                                                                                        |     | C1     | C2     | C3     | C4     | C5     | C6     | C7     | C8     | C9     | C10    | C5     |
| Company production capacity at European level (B)                                                                              |     | Medium |
| Company contribution to European production (C = B / number of companies at same level)                                        |     | 14%    | 14%    | 14%    | 14%    | 14%    | 14%    | 14%    | 25%    | 25%    | 25%    | 25%    |
| Contribution of plants in country to company European production (D = number of plants in country / European number of plants) | BEL | 100%   |        |        |        |        |        |        |        |        |        |        |
|                                                                                                                                | DEU |        |        |        | 100%   | 100%   |        |        |        |        | 100%   | 100%   |
|                                                                                                                                | ESP |        |        |        |        |        |        | 100%   |        |        |        |        |
|                                                                                                                                | FIN |        |        |        |        |        | 100%   |        |        |        |        |        |
|                                                                                                                                | GBR |        |        | 100%   |        |        |        |        |        | 100%   |        |        |
|                                                                                                                                | POL |        | 100%   |        |        |        |        |        | 100%   |        |        |        |
| Contribution of company to nano-ZnO production in country (A x C x D)                                                          | BEL | 11%    |        |        |        |        |        |        |        |        |        |        |
|                                                                                                                                | DEU |        |        |        | 11%    | 11%    |        |        |        |        | 5%     | 5%     |
|                                                                                                                                | ESP |        |        |        |        |        |        | 11%    |        |        |        |        |
|                                                                                                                                | FIN |        |        |        |        |        | 11%    |        |        |        |        |        |
|                                                                                                                                | GBR |        |        | 11%    |        |        |        |        |        | 5%     |        |        |
|                                                                                                                                | POL |        | 11%    |        |        |        |        |        | 5%     |        |        |        |

## Country distribution

Table S4: Surrogate variables chosen for country distribution for the manufacturing and consumption stages. Numbered entries are further explained below.

| <b>Application</b>                     | <b>Proxy for manufacturing stage</b>     | <b>Proxy for consumption stage</b> |
|----------------------------------------|------------------------------------------|------------------------------------|
| Anti-bacterial coatings                | GDP                                      | GDP                                |
| Anti-bacterials                        | GDP                                      | GDP                                |
| Cement                                 | Cement production                        | GDP                                |
| Ceramic                                | PRODCOM_Glass and ceramics               | Population                         |
| Cleaning agents                        | PRODCOM_Cleaning agents                  | Population                         |
| Cosmetics                              | Proxy sunscreen and cosmetics production | Proxy cosmetics use                |
| Printing electronics                   | PRODCOM_Electronic printing              | GDP                                |
| Electronics and appliances             | PRODCOM_Electronics and appliances       | GDP                                |
| Filters                                | PRODCOM_Filters                          | GDP                                |
| Food                                   | PRODCOM_Food                             | Population                         |
| Glass                                  | PRODCOM_Glass                            | Population                         |
| Medical                                | PRODCOM_Medical technolog                | GDP                                |
| Paints and building surface treatments | PRODCOM_Paints and Coatings              | ESIG paint consumption             |
| Rubber, ceramic and plastic additives  | GDP                                      | Population                         |
| Small personal care items              | GDP                                      | Population                         |
| Solar                                  | PRODCOM_Solar                            | GDP                                |
| Sunscreens                             | Proxy sunscreen and cosmetics production | Proxy sunscreen use                |
| Textiles                               | PRODCOM_Textiles                         | Population                         |

# Explanation of PRODCOM codes used for manufacturing of specific applications

Table S5: Explanation of PRODCOM codes used for each application

| Application                | Selected PRODCOM codes                                                                                                                                                                                                                                                                                                                                                                                                                                                                                                                                                                                                                                                                                                                                                                                                                                                                                                                                                                                                       |
|----------------------------|------------------------------------------------------------------------------------------------------------------------------------------------------------------------------------------------------------------------------------------------------------------------------------------------------------------------------------------------------------------------------------------------------------------------------------------------------------------------------------------------------------------------------------------------------------------------------------------------------------------------------------------------------------------------------------------------------------------------------------------------------------------------------------------------------------------------------------------------------------------------------------------------------------------------------------------------------------------------------------------------------------------------------|
| Cleaning agents            | 20412020, 20412030, 20412050, 20412090, 20413150, 20413240, 20413250, 20413260, 20413270, 20414330, 20414350, 20414370, 20414383, 20414389, 20414400                                                                                                                                                                                                                                                                                                                                                                                                                                                                                                                                                                                                                                                                                                                                                                                                                                                                         |
| Electronics and appliances | 26112220, 26112240, 26114070, 27511133, 27511135, 27511150, 27511170, 27511200, 27511200, 27511300, 28295000, 28298510, 28942150, 28942230, 28945210                                                                                                                                                                                                                                                                                                                                                                                                                                                                                                                                                                                                                                                                                                                                                                                                                                                                         |
| Filters                    | 28945210, 17124330, 17291200, 17291951, 22292630, 28291350, 28298250, 32995910                                                                                                                                                                                                                                                                                                                                                                                                                                                                                                                                                                                                                                                                                                                                                                                                                                                                                                                                               |
| Food                       | 100000Z1, 100000Z2, 10851100, 10851200, 10851300, 10851410, 10851900                                                                                                                                                                                                                                                                                                                                                                                                                                                                                                                                                                                                                                                                                                                                                                                                                                                                                                                                                         |
| Glass                      | 20302130                                                                                                                                                                                                                                                                                                                                                                                                                                                                                                                                                                                                                                                                                                                                                                                                                                                                                                                                                                                                                     |
| Glass and ceramics         | 20302130, 20302150, 20302170                                                                                                                                                                                                                                                                                                                                                                                                                                                                                                                                                                                                                                                                                                                                                                                                                                                                                                                                                                                                 |
| Medical technology         | 13202020, 21201380, 21202420, 21202430, 21202440, 21202460, 32501200, 32501311, 32501313, 32501315, 32501317, 32501370, 32502255, 32502259, 32502290, 32505010, 32505020, 32505030                                                                                                                                                                                                                                                                                                                                                                                                                                                                                                                                                                                                                                                                                                                                                                                                                                           |
| Paints and Coatings        | 20301150, 20301170, 20301225, 20301229, 20301230, 20301250, 20301270, 20301290, 20302130, 20302150, 20302170, 20302213, 20302215, 20302240, 20302253, 20302255, 20302260, 20302273, 20302279, 20302350, 20302370, 20302450, 20302470                                                                                                                                                                                                                                                                                                                                                                                                                                                                                                                                                                                                                                                                                                                                                                                         |
| Solar                      | 26112240                                                                                                                                                                                                                                                                                                                                                                                                                                                                                                                                                                                                                                                                                                                                                                                                                                                                                                                                                                                                                     |
| Textiles                   | 14121120, 14121240, 14121250, 14122120, 14122130, 14122240, 14122250, 14123013, 14123023, 14131110, 14131120, 14131230, 14131260, 14131270, 14131310, 14131320, 14131430, 14131460, 14131470, 14131480, 14131490, 14132115, 14132130, 14132200, 14132300, 14132442, 14132444, 14132445, 14132448, 14132449, 14132455, 14132460, 14133115, 14133130, 14133200, 14133330, 14133470, 14133480, 14133542, 14133548, 14133549, 14133551, 14133561, 14133563, 14133565, 14133569, 14141100, 14141220, 14141230, 14141240, 14141310, 14141420, 14141430, 14141440, 14141450, 14142100, 14142220, 14142230, 14142240, 14142300, 14142430, 14142450, 14142460, 14142480, 14142489, 14142530, 14142550, 14142570, 14143000, 14191210, 14191230, 14191240, 14191250, 14191290, 14191300, 14191960, 14192210, 14192220, 14192230, 14192240, 14192250, 14192370, 14192396, 14193175, 14193190, 14193200, 14311033, 14311035, 14311037, 14311050, 14311090, 14391031, 14391032, 14391033, 14391061, 14391062, 14391071, 14391072, 14391090 |

## Sludge management

Table S6: Transfer coefficients relating to sludge management (adapted from Eurostat<sup>1</sup>)

| Country        | Year | % Landfill | % Incineration | % Agricultural use |
|----------------|------|------------|----------------|--------------------|
| Belgium        | 2010 | 0%         | 87%            | 13%                |
| Bulgaria       | 2014 | 34%        | 0%             | 66%                |
| Czechia        | 2014 | 14%        | 6%             | 79%                |
| Denmark        | 2010 | 1%         | 31%            | 68%                |
| Germany        | 2014 | 0%         | 70%            | 30%                |
| Estonia        | 2009 | 90%        | 0%             | 10%                |
| Ireland        | 2014 | 1%         | 0%             | 99%                |
| Greece         | 2014 | 39%        | 38%            | 23%                |
| Spain          | 2012 | 16%        | 4%             | 80%                |
| France         | 2014 | 5%         | 27%            | 68%                |
| Croatia        | 2014 | 95%        | 0%             | 5%                 |
| Italy          | 2010 | 57%        | 5%             | 39%                |
| Cyprus         | 2014 | 0%         | 0%             | 100%               |
| Latvia         | 2013 | 3%         | 0%             | 97%                |
| Lithuania      | 2014 | 0%         | 0%             | 100%               |
| Luxembourg     | 2012 | 0%         | 16%            | 84%                |
| Hungary        | 2014 | 14%        | 74%            | 12%                |
| Malta          | 2014 | 100%       | 0%             | 0%                 |
| Netherlands    | 2014 | 0%         | 100%           | 0%                 |
| Austria        | 2014 | 2%         | 73%            | 25%                |
| Poland         | 2014 | 14%        | 38%            | 48%                |
| Portugal       | 2012 | 10%        | 0%             | 90%                |
| Romania        | 2014 | 91%        | 1%             | 8%                 |
| Slovenia       | 2014 | 2%         | 97%            | 1%                 |
| Slovakia       | 2014 | 21%        | 79%            | 0%                 |
| Finland        | 2012 | 20%        | 65%            | 15%                |
| Sweden         | 2014 | 6%         | 4%             | 90%                |
| United Kingdom | 2012 | 0%         | 21%            | 78%                |
| Norway         | 2014 | 18%        | 0%             | 83%                |
| Switzerland    | 2013 | 0%         | 100%           | 0%                 |

## Normalised releases to soil and surface water

Table S7: References used to calculate normalised releases to soil and surface water.

| <b>Country</b> | <b>Total surface area</b>      | <b>Freshwater surface</b> |
|----------------|--------------------------------|---------------------------|
| Austria        | Eurostat <sup>2</sup>          | Eurostat                  |
| Belgium        | Eurostat                       | Eurostat                  |
| Bulgaria       | Eurostat                       | Eurostat                  |
| Switzerland    | Steinmeier (2013) <sup>3</sup> | Steinmeier (2013)         |
| Cyprus         | Eurostat                       | Eurostat                  |
| Czech Republic | Eurostat                       | Eurostat                  |
| Germany        | Eurostat                       | Eurostat                  |
| Denmark        | Eurostat                       | Eurostat                  |
| Spain          | Eurostat                       | Eurostat                  |
| Estonia        | Eurostat                       | Klein (2000) <sup>4</sup> |
| Finland        | Eurostat                       | Eurostat                  |
| France         | Eurostat                       | Eurostat                  |
| United Kingdom | Eurostat                       | Eurostat                  |
| Greece         | Eurostat                       | Eurostat                  |
| Croatia        | Eurostat                       | Eurostat                  |
| Hungary        | Eurostat                       | Eurostat                  |
| Ireland        | Eurostat                       | Eurostat                  |
| Italy          | Eurostat                       | Eurostat                  |
| Lithuania      | Eurostat                       | Eurostat                  |
| Luxembourg     | Eurostat                       | Eurostat                  |
| Latvia         | Eurostat                       | Eurostat                  |
| Malta          | Eurostat                       | Eurostat                  |
| Netherlands    | Eurostat                       | Eurostat                  |



|          |                         |            |
|----------|-------------------------|------------|
| Norway   | Worldatlas <sup>5</sup> | Worldatlas |
| Poland   | Eurostat                | Eurostat   |
| Portugal | Eurostat                | Eurostat   |
| Romania  | Eurostat                | Eurostat   |
| Slovakia | Eurostat                | Eurostat   |
| Slovenia | Eurostat                | Eurostat   |
| Sweden   | Eurostat                | Eurostat   |

## Production, manufacturing and consumption results

Table S8: Overview of different information sources for applications of nanosized TiO<sub>2</sub> and their relative importance

| Application                                                                 | Future markets (2016) | Bund (n=61) | Danish (n=111) | Mean | Min  | Max  |
|-----------------------------------------------------------------------------|-----------------------|-------------|----------------|------|------|------|
| <b>Total personal care*</b>                                                 | 72%                   | 75%         | 81%            | 76%  | 72%  | 81%  |
| Sunscreens**                                                                | 72%                   | 64%         | 21%            | 57%  | 21%  | 64%  |
| Cosmetics**                                                                 |                       | 11%         | 60%            | 19%  | 11%  | 60%  |
| <b>Coatings*</b>                                                            | 20%                   | 21%         |                | 14%  | 0%   | 21%  |
| Paints and building surface treatments (e.g. photocatalytic, antimicrobial) | 10%                   | 5%          |                | 5%   | 0%   | 10%  |
| Cement                                                                      | 3%                    | 5%          |                | 3%   | 0%   | 5%   |
| Glass                                                                       | 3%                    | 5%          |                | 3%   | 0%   | 5%   |
| Ceramic                                                                     | 3%                    | 5%          |                | 3%   | 0%   | 5%   |
| Rubber, ceramic and plastic additives                                       | 5%                    | 2%          |                | 2%   | 0%   | 5%   |
| Solar                                                                       | 1%                    |             |                | 0.3% | 0%   | 1%   |
| Electronics and appliances                                                  | 0.5%                  | 2%          | 3%             | 2%   | 0.5% | 3%   |
| Cleaning agents                                                             | 0.5%                  |             | 2%             | 0.8% | 0%   | 2%   |
| Food                                                                        | 0.5%                  |             | 14%            | 5%   | 0%   | 14%  |
| Textiles                                                                    | 0.5%                  |             |                | 0.2% | 0%   | 0.5% |

(\*) This category represents the contribution of multiple applications from this table.

(\*\*) Sources provide opposite results, therefore the mean is not used here. Most references identify sunscreens as the most important application. Hence, it is assumed that sunscreens account for 57% of the total personal care products.

Table S9: Applications of nanosized ZnO and their relative importance.

| Application                           | Future markets (2016) | Min | Max  |
|---------------------------------------|-----------------------|-----|------|
| <b>Total personal care</b>            | 85%                   | 43% | 100% |
| <b>Paints and lacquers (coatings)</b> | 13%                   | 7%  | 20%  |
| <b>Antibacterial</b>                  | 2%                    | 1%  | 3%   |

Table S10: Applications of nanosized Ag and their relative importance.

| Application                                                                                           | Final | Min  | Max   |
|-------------------------------------------------------------------------------------------------------|-------|------|-------|
| Electronic printing                                                                                   | 80%   | 40%  | 100%  |
| Medical (including wound dressing and coatings in medical devices)                                    | 9%    | 4.5% | 13.5% |
| Anti-bacterial coatings (indoor use, long-lasting products that are applied on surfaces, also paints) | 5%    | 2.5% | 7.5%  |
| Cosmetics and personal care (liquids and gel)                                                         | 2%    | 1%   | 3%    |
| Textiles                                                                                              | 2%    | 1%   | 3%    |
| Food                                                                                                  | 0.2%  | 0.1% | 0.3%  |
| Cleaning agents (short-lasting products)                                                              | 0.2%  | 0.1% | 0.3%  |
| Appliances                                                                                            | 0.2%  | 0.1% | 0.3%  |
| Small personal care items (non-liquids)                                                               | 0.2%  | 0.1% | 0.3%  |
| Filters                                                                                               | 0.2%  | 0.1% | 0.3%  |

Table S11: Total estimated production of ENMs in Europe (EU28 + Norway + Switzerland) and distributions over countries (in percentage). Countries not mentioned are assumed to have no production of each of the three ENMs.

| Country                         | Nano-TiO <sub>2</sub> | Nano-ZnO | Nano-Ag |
|---------------------------------|-----------------------|----------|---------|
| Average European total (tonnes) | 38900                 | 7260     | 5       |
| BEL                             | 0.4%                  | 12%      | 11%     |
| CHE                             |                       |          | 5%      |
| CZE                             | 4.4%                  | 0.1%     |         |
| DEU                             | 21%                   | 45%      | 33%     |
| ESP                             | 36%                   | 0.1%     | 11%     |
| FIN                             | 6.0%                  |          | 11%     |
| FRA                             | 6.8%                  | 5.4%     |         |
| GBR                             | 5.7%                  | 5.5%     | 11%     |
| ITA                             | 5.7%                  | 4.6%     |         |
| NLD                             |                       | 16%      |         |
| NOR                             | 1.0%                  | 12%      |         |
| POL                             |                       |          | 16%     |
| SVN                             | 13%                   |          |         |

Values have been rounded to maximum 2 significant digit. All columns add up to 100%.

Table S12: Total estimated manufacturing and consumption of ENMs in Europe (EU28 + Norway + Switzerland) and distributions over countries (in percentage).

| Country | Manufacturing         |          |         | Consumption           |          |         |
|---------|-----------------------|----------|---------|-----------------------|----------|---------|
|         | Nano-TiO <sub>2</sub> | Nano-ZnO | Nano-Ag | Nano-TiO <sub>2</sub> | Nano-ZnO | Nano-Ag |
| AUT     | 1.5%                  | 1.5%     | 0.3%    | 1.6%                  | 1.8%     | 2.2%    |
| BEL     | 2.6%                  | 2.9%     | 2.6%    | 2.5%                  | 2.4%     | 2.7%    |
| BGR     | 0.4%                  | 0.4%     | 0.1%    | 0.6%                  | 0.5%     | 0.3%    |
| CHE     | 2.5%                  | 2.4%     | 3.5%    | 1.5%                  | 1.5%     | 3.4%    |
| CYP     | 0.0%                  | 0.0%     | 0.0%    | 0.3%                  | 0.4%     | 0.1%    |
| CZE     | 0.9%                  | 0.9%     | 0.2%    | 1.9%                  | 2.0%     | 1.1%    |
| DEU     | 19%                   | 19%      | 35.6%   | 11%                   | 9.5%     | 19%     |
| DNK     | 1.2%                  | 1.2%     | 0.8%    | 1.1%                  | 1.0%     | 1.7%    |
| ESP     | 11%                   | 8.7%     | 6.8%    | 14%                   | 15%      | 7.1%    |
| EST     | 0.2%                  | 0.2%     | 0.0%    | 0.2%                  | 0.2%     | 0.1%    |
| FIN     | 1.0%                  | 1.1%     | 0.9%    | 1.0%                  | 0.9%     | 1.4%    |
| FRA     | 16%                   | 17%      | 7.3%    | 14%                   | 14%      | 14%     |
| GBR     | 12%                   | 13%      | 16%     | 14%                   | 14%      | 15%     |
| GRC     | 0.8%                  | 0.9%     | 0.2%    | 2.3%                  | 2.4%     | 1.2%    |
| HRV     | 0.5%                  | 0.5%     | 0.1%    | 0.7%                  | 0.7%     | 0.3%    |
| HUN     | 0.7%                  | 0.7%     | 0.3%    | 1.0%                  | 0.8%     | 0.8%    |
| IRL     | 0.9%                  | 1.0%     | 2.6%    | 0.7%                  | 0.7%     | 1.2%    |
| ITA     | 13%                   | 12%      | 13%     | 15%                   | 16%      | 11%     |
| LTU     | 0.3%                  | 0.3%     | 0.2%    | 0.3%                  | 0.3%     | 0.3%    |
| LUX     | 0.7%                  | 0.8%     | 0.0%    | 0.1%                  | 0.1%     | 0.3%    |
| LVA     | 0.2%                  | 0.2%     | 0.0%    | 0.3%                  | 0.2%     | 0.2%    |
| MLT     | 0.0%                  | 0.0%     | 0.0%    | 0.1%                  | 0.1%     | 0.1%    |
| NLD     | 3.9%                  | 3.7%     | 6.5%    | 2.9%                  | 2.8%     | 4.4%    |
| NOR     | 1.2%                  | 1.2%     | 0.2%    | 1.2%                  | 1.2%     | 2.4%    |
| POL     | 4.4%                  | 4.1%     | 1.8%    | 4.8%                  | 4.5%     | 3.0%    |
| PRT     | 1.3%                  | 1.4%     | 0.5%    | 2.2%                  | 2.3%     | 1.2%    |
| ROU     | 1.3%                  | 1.3%     | 0.4%    | 1.2%                  | 0.9%     | 1.1%    |
| SVK     | 0.5%                  | 0.5%     | 0.1%    | 1.6%                  | 1.7%     | 0.5%    |
| SVN     | 0.2%                  | 0.2%     | 0.0%    | 0.4%                  | 0.4%     | 0.3%    |
| SWE     | 2.0%                  | 2.3%     | 0.2%    | 1.5%                  | 1.6%     | 2.8%    |

Values have been rounded to maximum 2 significant digits. All columns add up to 100%.

## Modelling results

Table S13: 25<sup>th</sup> quantiles, means and 75<sup>th</sup> quantiles of flows of nano-TiO<sub>2</sub> (tonnes)

|               |                          | Austria     |      |      | Belgium |      |      | Bulgaria       |      |      |
|---------------|--------------------------|-------------|------|------|---------|------|------|----------------|------|------|
| From          | To                       | Q25         | Mean | Q75  | Q25     | Mean | Q75  | Q25            | Mean | Q75  |
| Import        | Manufacturing            | 31          | 558  | 556  | 47      | 835  | 845  | 8              | 149  | 149  |
| Import        | Consumption              | 4           | 114  | 113  | 0       | 0    | 0    | 5              | 98   | 100  |
| Production    | Manufacturing            | 0           | 0    | 0    | 128     | 155  | 271  | 0              | 0    | 0    |
| Production    | Wastewater               | 0           | 0    | 0    | 0       | 3    | 3    | 0              | 0    | 0    |
| Production    | Air                      | 0           | 0    | 0    | 0       | 0    | 0    | 0              | 0    | 0    |
| Production    | Export                   | 0           | 0    | 0    | 0       | 0    | 0    | 0              | 0    | 0    |
| Manufacturing | Consumption              | 107         | 556  | 669  | 167     | 954  | 1078 | 65             | 246  | 347  |
| Manufacturing | Wastewater               | 0           | 1    | 1    | 0       | 1    | 1    | 0              | 0    | 0    |
| Manufacturing | Air                      | 0           | 0    | 0    | 0       | 0    | 0    | 0              | 0    | 0    |
| Manufacturing | Recycling systems        | 0           | 1    | 1    | 0       | 1    | 1    | 0              | 0    | 0    |
| Manufacturing | Export                   | 0           | 0    | 0    | 0       | 34   | 77   | 0              | 0    | 0    |
| Consumption   | Wastewater               | 78          | 481  | 559  | 118     | 685  | 772  | 45             | 177  | 245  |
| Consumption   | Air                      | 0           | 1    | 2    | 0       | 2    | 2    | 0              | 1    | 1    |
| Consumption   | Surface water            | 8           | 52   | 61   | 13      | 74   | 84   | 5              | 19   | 26   |
| Consumption   | Natural & urban soil     | 0           | 1    | 2    | 0       | 2    | 2    | 0              | 0    | 1    |
| Consumption   | Landfill                 | 1           | 4    | 5    | 0       | 1    | 1    | 3              | 13   | 17   |
| Consumption   | Waste incineration plant | 5           | 32   | 36   | 6       | 40   | 45   | 0              | 0    | 0    |
| Consumption   | Recycling systems        | 14          | 98   | 112  | 23      | 150  | 168  | 8              | 36   | 47   |
| Wastewater    | WWTP                     | 77          | 466  | 543  | 116     | 663  | 749  | 45             | 171  | 239  |
| Wastewater    | Surface water            | 3           | 15   | 18   | 4       | 22   | 25   | 1              | 6    | 8    |
| WWTP          | Sludge                   | 50          | 355  | 398  | 76      | 508  | 570  | 27             | 130  | 164  |
| WWTP          | Surface water            | 12          | 111  | 121  | 19      | 155  | 171  | 5              | 41   | 43   |
| Sludge        | Sludge-treated soil      | 12          | 87   | 98   | 10      | 68   | 76   | 18             | 86   | 108  |
| Sludge        | Landfill                 | 1           | 7    | 8    | 0       | 0    | 0    | 10             | 44   | 59   |
| Sludge        | Waste incineration plant | 39          | 261  | 295  | 69      | 440  | 495  | 0              | 0    | 0    |
|               |                          | Switzerland |      |      | Cyprus  |      |      | Czech Republic |      |      |
| From          | To                       | Q25         | Mean | Q75  | Q25     | Mean | Q75  | Q25            | Mean | Q75  |
| Import        | Manufacturing            | 58          | 983  | 1025 | 0       | 4    | 4    | 0              | 0    | 0    |
| Import        | Consumption              | 0           | 0    | 0    | 8       | 125  | 126  | 22             | 409  | 430  |
| Production    | Manufacturing            | 0           | 0    | 0    | 0       | 0    | 0    | 17             | 308  | 319  |
| Production    | Wastewater               | 0           | 0    | 0    | 0       | 0    | 0    | 2              | 34   | 35   |
| Production    | Air                      | 0           | 0    | 0    | 0       | 0    | 0    | 0              | 0    | 0    |
| Production    | Export                   | 0           | 0    | 0    | 0       | 0    | 0    | 77             | 1389 | 1442 |
| Manufacturing | Consumption              | 33          | 575  | 595  | 5       | 4    | 5    | 165            | 307  | 596  |
| Manufacturing | Wastewater               | 0           | 1    | 1    | 0       | 0    | 0    | 0              | 0    | 0    |
| Manufacturing | Air                      | 0           | 0    | 0    | 0       | 0    | 0    | 0              | 0    | 0    |
| Manufacturing | Recycling systems        | 0           | 1    | 1    | 0       | 0    | 0    | 0              | 1    | 1    |
| Manufacturing | Export                   | 23          | 406  | 422  | 0       | 0    | 0    | 0              | 0    | 0    |
| Consumption   | Wastewater               | 24          | 412  | 427  | 9       | 93   | 94   | 130            | 514  | 727  |
| Consumption   | Air                      | 0           | 1    | 1    | 0       | 0    | 0    | 0              | 2    | 2    |
| Consumption   | Surface water            | 2           | 45   | 47   | 1       | 10   | 10   | 14             | 56   | 77   |
| Consumption   | Natural & urban soil     | 0           | 1    | 1    | 0       | 0    | 0    | 0              | 1    | 2    |
| Consumption   | Landfill                 | 0           | 0    | 0    | 1       | 7    | 7    | 9              | 38   | 51   |
| Consumption   | Waste incineration plant | 1           | 22   | 23   | 0       | 0    | 0    | 2              | 11   | 14   |
| Consumption   | Recycling systems        | 5           | 93   | 96   | 2       | 19   | 19   | 20             | 94   | 125  |
| Wastewater    | WWTP                     | 23          | 399  | 413  | 8       | 90   | 91   | 129            | 498  | 711  |
| Wastewater    | Surface water            | 1           | 13   | 13   | 0       | 3    | 3    | 4              | 16   | 24   |
| WWTP          | Sludge                   | 16          | 304  | 311  | 6       | 69   | 69   | 82             | 378  | 497  |
| WWTP          | Surface water            | 3           | 95   | 99   | 1       | 21   | 23   | 15             | 120  | 122  |
| Sludge        | Sludge-treated soil      | 0           | 0    | 0    | 6       | 69   | 69   | 65             | 300  | 394  |
| Sludge        | Landfill                 | 0           | 0    | 0    | 0       | 0    | 0    | 14             | 54   | 77   |
| Sludge        | Waste incineration plant | 16          | 304  | 312  | 0       | 0    | 0    | 6              | 24   | 33   |

Table S13 (continued): 25<sup>th</sup> quantiles, means and 75<sup>th</sup> quantiles of flows of nano-TiO<sub>2</sub> (tonnes)

|               |                          | Germany |      |      | Denmark |      |      | Spain  |       |       |
|---------------|--------------------------|---------|------|------|---------|------|------|--------|-------|-------|
| From          | To                       | Q25     | Mean | Q75  | Q25     | Mean | Q75  | Q25    | Mean  | Q75   |
| Import        | Manufacturing            | 0       | 0    | 0    | 27      | 477  | 475  | 0      | 0     | 0     |
| Import        | Consumption              | 0       | 0    | 0    | 0       | 0    | 0    | 71     | 1593  | 1619  |
| Production    | Manufacturing            | 402     | 7271 | 7303 | 0       | 0    | 0    | 226    | 3868  | 3988  |
| Production    | Wastewater               | 7       | 164  | 167  | 0       | 0    | 0    | 14     | 283   | 293   |
| Production    | Air                      | 0       | 0    | 0    | 0       | 0    | 0    | 0      | 0     | 0     |
| Production    | Export                   | 13      | 865  | 888  | 0       | 0    | 0    | 593    | 10109 | 10457 |
| Manufacturing | Consumption              | 215     | 3971 | 3998 | 23      | 422  | 426  | 1224   | 3853  | 5503  |
| Manufacturing | Wastewater               | 1       | 19   | 19   | 0       | 1    | 1    | 0      | 5     | 5     |
| Manufacturing | Air                      | 0       | 0    | 0    | 0       | 0    | 0    | 0      | 0     | 0     |
| Manufacturing | Recycling systems        | 0       | 5    | 6    | 0       | 0    | 0    | 0      | 10    | 10    |
| Manufacturing | Export                   | 174     | 3275 | 3322 | 0       | 55   | 61   | 0      | 0     | 0     |
| Consumption   | Wastewater               | 152     | 2850 | 2876 | 16      | 303  | 306  | 902    | 3907  | 5036  |
| Consumption   | Air                      | 0       | 9    | 9    | 0       | 1    | 1    | 2      | 12    | 14    |
| Consumption   | Surface water            | 16      | 309  | 316  | 2       | 33   | 34   | 95     | 424   | 544   |
| Consumption   | Natural & urban soil     | 0       | 8    | 8    | 0       | 1    | 1    | 2      | 11    | 14    |
| Consumption   | Landfill                 | 0       | 1    | 1    | 0       | 7    | 7    | 65     | 319   | 402   |
| Consumption   | Waste incineration plant | 8       | 164  | 166  | 1       | 15   | 15   | 11     | 55    | 69    |
| Consumption   | Recycling systems        | 31      | 631  | 641  | 3       | 63   | 64   | 136    | 718   | 887   |
| Wastewater    | WWTP                     | 150     | 2759 | 2774 | 16      | 293  | 296  | 895    | 3782  | 4942  |
| Wastewater    | Surface water            | 5       | 91   | 89   | 1       | 10   | 10   | 30     | 125   | 166   |
| WWTP          | Sludge                   | 106     | 2095 | 2088 | 11      | 224  | 228  | 523    | 2876  | 3516  |
| WWTP          | Surface water            | 21      | 664  | 718  | 2       | 68   | 71   | 110    | 906   | 956   |
| Sludge        | Sludge-treated soil      | 32      | 638  | 636  | 8       | 152  | 155  | 417    | 2295  | 2807  |
| Sludge        | Landfill                 | 0       | 0    | 0    | 0       | 3    | 3    | 108    | 460   | 591   |
| Sludge        | Waste incineration plant | 75      | 1457 | 1460 | 4       | 70   | 71   | 27     | 121   | 154   |
|               |                          | Estonia |      |      | Finland |      |      | France |       |       |
| From          | To                       | Q25     | Mean | Q75  | Q25     | Mean | Q75  | Q25    | Mean  | Q75   |
| Import        | Manufacturing            | 4       | 62   | 65   | 0       | 0    | 0    | 346    | 6229  | 6341  |
| Import        | Consumption              | 1       | 18   | 18   | 0       | 0    | 0    | 0      | 0     | 0     |
| Production    | Manufacturing            | 0       | 0    | 0    | 20      | 341  | 353  | 190    | 158   | 191   |
| Production    | Wastewater               | 0       | 0    | 0    | 2       | 46   | 47   | 0      | 3     | 3     |
| Production    | Air                      | 0       | 0    | 0    | 0       | 0    | 0    | 0      | 0     | 0     |
| Production    | Export                   | 0       | 0    | 0    | 112     | 1913 | 1972 | 0      | 0     | 0     |
| Manufacturing | Consumption              | 16      | 62   | 82   | 19      | 323  | 333  | 465    | 5605  | 5802  |
| Manufacturing | Wastewater               | 0       | 0    | 0    | 0       | 1    | 1    | 1      | 8     | 9     |
| Manufacturing | Air                      | 0       | 0    | 0    | 0       | 0    | 0    | 0      | 0     | 0     |
| Manufacturing | Recycling systems        | 0       | 0    | 0    | 0       | 0    | 0    | 0      | 5     | 5     |
| Manufacturing | Export                   | 0       | 0    | 0    | 0       | 17   | 25   | 9      | 770   | 849   |
| Consumption   | Wastewater               | 12      | 58   | 71   | 13      | 232  | 239  | 329    | 4020  | 4173  |
| Consumption   | Air                      | 0       | 0    | 0    | 0       | 1    | 1    | 1      | 12    | 12    |
| Consumption   | Surface water            | 1       | 6    | 8    | 1       | 25   | 26   | 35     | 438   | 458   |
| Consumption   | Natural & urban soil     | 0       | 0    | 0    | 0       | 1    | 1    | 1      | 11    | 12    |
| Consumption   | Landfill                 | 0       | 1    | 1    | 0       | 4    | 4    | 9      | 122   | 127   |
| Consumption   | Waste incineration plant | 1       | 4    | 5    | 0       | 8    | 8    | 13     | 164   | 170   |
| Consumption   | Recycling systems        | 2       | 11   | 13   | 3       | 53   | 55   | 64     | 838   | 864   |
| Wastewater    | WWTP                     | 11      | 56   | 69   | 13      | 224  | 231  | 323    | 3891  | 4034  |
| Wastewater    | Surface water            | 0       | 2    | 2    | 0       | 7    | 7    | 11     | 129   | 136   |
| WWTP          | Sludge                   | 7       | 43   | 50   | 9       | 170  | 175  | 234    | 2967  | 3063  |
| WWTP          | Surface water            | 2       | 13   | 15   | 2       | 54   | 56   | 52     | 925   | 971   |
| Sludge        | Sludge-treated soil      | 1       | 4    | 5    | 1       | 25   | 26   | 158    | 2004  | 2070  |
| Sludge        | Landfill                 | 6       | 38   | 46   | 2       | 34   | 35   | 13     | 149   | 155   |
| Sludge        | Waste incineration plant | 0       | 0    | 0    | 6       | 111  | 115  | 66     | 813   | 848   |

Table S13 (continued): 25<sup>th</sup> quantiles, means and 75<sup>th</sup> quantiles of flows of nano-TiO<sub>2</sub> (tonnes)

|               |                          | United Kingdom |      |      | Greece  |      |     | Croatia |      |      |
|---------------|--------------------------|----------------|------|------|---------|------|-----|---------|------|------|
| From          | To                       | Q25            | Mean | Q75  | Q25     | Mean | Q75 | Q25     | Mean | Q75  |
| Import        | Manufacturing            | 153            | 2578 | 2662 | 19      | 331  | 341 | 11      | 194  | 202  |
| Import        | Consumption              | 41             | 1134 | 1137 | 31      | 549  | 563 | 4       | 88   | 89   |
| Production    | Manufacturing            | 1146           | 2185 | 4256 | 0       | 0    | 0   | 0       | 0    | 0    |
| Production    | Wastewater               | 2              | 43   | 44   | 0       | 0    | 0   | 0       | 0    | 0    |
| Production    | Air                      | 0              | 0    | 0    | 0       | 0    | 0   | 0       | 0    | 0    |
| Production    | Export                   | 0              | 0    | 0    | 0       | 0    | 0   | 0       | 0    | 0    |
| Manufacturing | Consumption              | 1879           | 4744 | 7381 | 195     | 329  | 651 | 64      | 193  | 286  |
| Manufacturing | Wastewater               | 2              | 6    | 9    | 0       | 0    | 0   | 0       | 0    | 0    |
| Manufacturing | Air                      | 0              | 0    | 0    | 0       | 0    | 0   | 0       | 0    | 0    |
| Manufacturing | Recycling systems        | 3              | 12   | 15   | 0       | 1    | 1   | 0       | 0    | 0    |
| Manufacturing | Export                   | 0              | 0    | 0    | 0       | 0    | 0   | 0       | 0    | 0    |
| Consumption   | Wastewater               | 1350           | 4216 | 6039 | 158     | 630  | 858 | 47      | 202  | 267  |
| Consumption   | Air                      | 3              | 13   | 17   | 0       | 2    | 2   | 0       | 1    | 1    |
| Consumption   | Surface water            | 142            | 459  | 646  | 17      | 68   | 92  | 5       | 22   | 29   |
| Consumption   | Natural & urban soil     | 4              | 12   | 16   | 0       | 2    | 2   | 0       | 1    | 1    |
| Consumption   | Landfill                 | 51             | 180  | 247  | 11      | 48   | 63  | 4       | 19   | 24   |
| Consumption   | Waste incineration plant | 39             | 136  | 187  | 0       | 0    | 0   | 0       | 0    | 0    |
| Consumption   | Recycling systems        | 245            | 863  | 1184 | 28      | 128  | 166 | 7       | 38   | 48   |
| Wastewater    | WWTP                     | 1334           | 4081 | 5895 | 157     | 610  | 839 | 47      | 195  | 261  |
| Wastewater    | Surface water            | 45             | 135  | 196  | 5       | 20   | 27  | 2       | 6    | 9    |
| WWTP          | Sludge                   | 863            | 3108 | 4268 | 101     | 465  | 599 | 28      | 149  | 183  |
| WWTP          | Surface water            | 165            | 973  | 1027 | 19      | 145  | 152 | 6       | 47   | 50   |
| Sludge        | Sludge-treated soil      | 677            | 2434 | 3338 | 23      | 106  | 136 | 1       | 7    | 9    |
| Sludge        | Landfill                 | 10             | 14   | 28   | 43      | 181  | 240 | 28      | 141  | 177  |
| Sludge        | Waste incineration plant | 195            | 661  | 915  | 39      | 179  | 229 | 0       | 0    | 0    |
|               |                          | Hungary        |      |      | Ireland |      |     | Italy   |      |      |
| From          | To                       | Q25            | Mean | Q75  | Q25     | Mean | Q75 | Q25     | Mean | Q75  |
| Import        | Manufacturing            | 17             | 289  | 300  | 21      | 368  | 378 | 158     | 2849 | 2940 |
| Import        | Consumption              | 4              | 94   | 97   | 0       | 0    | 0   | 40      | 1097 | 1090 |
| Production    | Manufacturing            | 0              | 0    | 0    | 0       | 0    | 0   | 1187    | 2187 | 4404 |
| Production    | Wastewater               | 0              | 0    | 0    | 0       | 0    | 0   | 2       | 43   | 44   |
| Production    | Air                      | 0              | 0    | 0    | 0       | 0    | 0   | 0       | 0    | 0    |
| Production    | Export                   | 0              | 0    | 0    | 0       | 0    | 0   | 0       | 0    | 0    |
| Manufacturing | Consumption              | 79             | 288  | 386  | 16      | 295  | 304 | 1917    | 5017 | 7718 |
| Manufacturing | Wastewater               | 0              | 0    | 0    | 0       | 0    | 0   | 2       | 6    | 9    |
| Manufacturing | Air                      | 0              | 0    | 0    | 0       | 0    | 0   | 0       | 0    | 0    |
| Manufacturing | Recycling systems        | 0              | 1    | 1    | 0       | 0    | 0   | 3       | 13   | 16   |
| Manufacturing | Export                   | 0              | 0    | 0    | 2       | 73   | 75  | 0       | 0    | 0    |
| Consumption   | Wastewater               | 58             | 274  | 344  | 11      | 212  | 218 | 1374    | 4387 | 6260 |
| Consumption   | Air                      | 0              | 1    | 1    | 0       | 1    | 1   | 3       | 13   | 18   |
| Consumption   | Surface water            | 6              | 30   | 37   | 1       | 23   | 24  | 144     | 477  | 671  |
| Consumption   | Natural & urban soil     | 0              | 1    | 1    | 0       | 1    | 1   | 4       | 12   | 17   |
| Consumption   | Landfill                 | 4              | 22   | 27   | 0       | 8    | 8   | 39      | 144  | 197  |
| Consumption   | Waste incineration plant | 1              | 4    | 5    | 0       | 4    | 4   | 38      | 140  | 191  |
| Consumption   | Recycling systems        | 9              | 50   | 61   | 2       | 47   | 49  | 265     | 941  | 1292 |
| Wastewater    | WWTP                     | 58             | 266  | 336  | 11      | 205  | 211 | 1359    | 4247 | 6117 |
| Wastewater    | Surface water            | 2              | 9    | 11   | 0       | 7    | 7   | 45      | 140  | 202  |
| WWTP          | Sludge                   | 34             | 203  | 241  | 8       | 156  | 159 | 883     | 3229 | 4458 |
| WWTP          | Surface water            | 8              | 63   | 68   | 2       | 49   | 52  | 166     | 1017 | 1060 |
| Sludge        | Sludge-treated soil      | 5              | 28   | 33   | 8       | 155  | 157 | 340     | 1252 | 1726 |
| Sludge        | Landfill                 | 7              | 31   | 39   | 0       | 2    | 2   | 516     | 1832 | 2532 |
| Sludge        | Waste incineration plant | 25             | 144  | 171  | 0       | 0    | 0   | 49      | 146  | 215  |



Table S13 (continued): 25<sup>th</sup> quantiles, means and 75<sup>th</sup> quantiles of flows of nano-TiO<sub>2</sub> (tonnes)

|               |                          | Lithuania |      |     | Luxemburg   |      |      | Latvia |      |     |
|---------------|--------------------------|-----------|------|-----|-------------|------|------|--------|------|-----|
| From          | To                       | Q25       | Mean | Q75 | Q25         | Mean | Q75  | Q25    | Mean | Q75 |
| Import        | Manufacturing            | 6         | 113  | 115 | 16          | 278  | 288  | 4      | 74   | 75  |
| Import        | Consumption              | 1         | 23   | 23  | 0           | 0    | 0    | 1      | 25   | 26  |
| Production    | Manufacturing            | 0         | 0    | 0   | 0           | 0    | 0    | 0      | 0    | 0   |
| Production    | Wastewater               | 0         | 0    | 0   | 0           | 0    | 0    | 0      | 0    | 0   |
| Production    | Air                      | 0         | 0    | 0   | 0           | 0    | 0    | 0      | 0    | 0   |
| Production    | Export                   | 0         | 0    | 0   | 0           | 0    | 0    | 0      | 0    | 0   |
| Manufacturing | Consumption              | 23        | 113  | 137 | 3           | 55   | 57   | 21     | 74   | 100 |
| Manufacturing | Wastewater               | 0         | 0    | 0   | 0           | 0    | 0    | 0      | 0    | 0   |
| Manufacturing | Air                      | 0         | 0    | 0   | 0           | 0    | 0    | 0      | 0    | 0   |
| Manufacturing | Recycling systems        | 0         | 0    | 0   | 0           | 0    | 0    | 0      | 0    | 0   |
| Manufacturing | Export                   | 0         | 0    | 0   | 13          | 223  | 230  | 0      | 0    | 0   |
| Consumption   | Wastewater               | 17        | 98   | 115 | 2           | 39   | 41   | 15     | 71   | 89  |
| Consumption   | Air                      | 0         | 0    | 0   | 0           | 0    | 0    | 0      | 0    | 0   |
| Consumption   | Surface water            | 2         | 11   | 12  | 0           | 4    | 4    | 2      | 8    | 10  |
| Consumption   | Natural & urban soil     | 0         | 0    | 0   | 0           | 0    | 0    | 0      | 0    | 0   |
| Consumption   | Landfill                 | 1         | 8    | 9   | 0           | 0    | 0    | 1      | 6    | 7   |
| Consumption   | Waste incineration plant | 0         | 0    | 0   | 0           | 2    | 2    | 0      | 0    | 0   |
| Wastewater    | WWTP                     | 17        | 95   | 111 | 2           | 38   | 39   | 15     | 69   | 87  |
| Wastewater    | Surface water            | 1         | 3    | 4   | 0           | 1    | 1    | 1      | 2    | 3   |
| WWTP          | Sludge                   | 10        | 72   | 81  | 1           | 29   | 30   | 9      | 52   | 62  |
| WWTP          | Surface water            | 3         | 23   | 25  | 0           | 9    | 9    | 2      | 16   | 18  |
| Sludge        | Sludge-treated soil      | 10        | 72   | 81  | 1           | 24   | 25   | 9      | 51   | 60  |
| Sludge        | Landfill                 | 0         | 0    | 0   | 0           | 0    | 0    | 0      | 1    | 2   |
| Sludge        | Waste incineration plant | 0         | 0    | 0   | 0           | 5    | 5    | 0      | 0    | 0   |
| Consumption   | Recycling systems        | 3         | 20   | 23  | 0           | 9    | 9    | 3      | 14   | 17  |
|               |                          | Malta     |      |     | Netherlands |      |      | Norway |      |     |
| From          | To                       | Q25       | Mean | Q75 | Q25         | Mean | Q75  | Q25    | Mean | Q75 |
| Import        | Manufacturing            | 0         | 4    | 4   | 60          | 1097 | 1132 | 3      | 76   | 76  |
| Import        | Consumption              | 2         | 43   | 44  | 0           | 0    | 0    | 2      | 65   | 65  |
| Production    | Manufacturing            | 0         | 0    | 0   | 261         | 383  | 752  | 79     | 375  | 444 |
| Production    | Wastewater               | 0         | 0    | 0   | 0           | 8    | 7    | 0      | 7    | 8   |
| Production    | Air                      | 0         | 0    | 0   | 0           | 0    | 0    | 0      | 0    | 0   |
| Production    | Export                   | 0         | 0    | 0   | 0           | 0    | 0    | 0      | 0    | 0   |
| Manufacturing | Consumption              | 4         | 4    | 5   | 229         | 1098 | 1384 | 139    | 449  | 556 |
| Manufacturing | Wastewater               | 0         | 0    | 0   | 0           | 2    | 2    | 0      | 1    | 1   |
| Manufacturing | Air                      | 0         | 0    | 0   | 0           | 0    | 0    | 0      | 0    | 0   |
| Manufacturing | Recycling systems        | 0         | 0    | 0   | 0           | 1    | 1    | 0      | 1    | 1   |
| Manufacturing | Export                   | 0         | 0    | 0   | 54          | 379  | 452  | 0      | 0    | 0   |
| Consumption   | Wastewater               | 4         | 34   | 36  | 160         | 788  | 988  | 99     | 369  | 446 |
| Consumption   | Air                      | 0         | 0    | 0   | 0           | 2    | 3    | 0      | 1    | 1   |
| Consumption   | Surface water            | 0         | 4    | 4   | 17          | 86   | 106  | 10     | 40   | 48  |
| Consumption   | Natural & urban soil     | 0         | 0    | 0   | 0           | 2    | 3    | 0      | 1    | 1   |
| Consumption   | Landfill                 | 0         | 3    | 3   | 0           | 1    | 1    | 0      | 1    | 1   |
| Consumption   | Waste incineration plant | 0         | 0    | 0   | 9           | 52   | 63   | 6      | 25   | 30  |
| Consumption   | Recycling systems        | 1         | 6    | 7   | 29          | 167  | 203  | 17     | 77   | 92  |
| Wastewater    | WWTP                     | 4         | 33   | 34  | 159         | 762  | 964  | 98     | 357  | 432 |
| Wastewater    | Surface water            | 0         | 1    | 1   | 5           | 25   | 31   | 3      | 12   | 14  |
| WWTP          | Sludge                   | 3         | 25   | 26  | 96          | 584  | 696  | 57     | 273  | 325 |
| WWTP          | Surface water            | 1         | 8    | 8   | 21          | 178  | 192  | 13     | 85   | 94  |
| Sludge        | Sludge-treated soil      | 0         | 0    | 0   | 0           | 0    | 0    | 47     | 225  | 268 |
| Sludge        | Landfill                 | 3         | 25   | 26  | 0           | 0    | 0    | 10     | 48   | 57  |
| Sludge        | Waste incineration plant | 0         | 0    | 0   | 101         | 584  | 703  | 0      | 0    | 0   |

Table S13 (continued): 25<sup>th</sup> quantiles, means and 75<sup>th</sup> quantiles of flows of nano-TiO<sub>2</sub> (tonnes)

|               |                          | Poland   |      |      | Portugal |      |      | Romania |      |     |
|---------------|--------------------------|----------|------|------|----------|------|------|---------|------|-----|
| From          | To                       | Q25      | Mean | Q75  | Q25      | Mean | Q75  | Q25     | Mean | Q75 |
| Import        | Manufacturing            | 77       | 1334 | 1381 | 32       | 530  | 531  | 29      | 499  | 517 |
| Import        | Consumption              | 10       | 305  | 309  | 17       | 338  | 342  | 0       | 0    | 0   |
| Production    | Manufacturing            | 276      | 387  | 769  | 0        | 0    | 0    | 0       | 0    | 0   |
| Production    | Wastewater               | 0        | 8    | 7    | 0        | 0    | 0    | 0       | 0    | 0   |
| Production    | Export                   | 0        | 0    | 0    | 0        | 0    | 0    | 0       | 0    | 0   |
| Production    | Air                      | 0        | 0    | 0    | 0        | 0    | 0    | 0       | 0    | 0   |
| Manufacturing | Consumption              | 560      | 1714 | 2335 | 213      | 528  | 861  | 28      | 487  | 507 |
| Manufacturing | Wastewater               | 0        | 2    | 3    | 0        | 1    | 1    | 0       | 1    | 1   |
| Manufacturing | Air                      | 0        | 0    | 0    | 0        | 0    | 0    | 0       | 0    | 0   |
| Manufacturing | Recycling systems        | 1        | 4    | 5    | 0        | 1    | 1    | 0       | 0    | 0   |
| Manufacturing | Export                   | 0        | 0    | 0    | 0        | 0    | 0    | 0       | 11   | 29  |
| Consumption   | Wastewater               | 398      | 1449 | 1882 | 160      | 621  | 846  | 20      | 349  | 365 |
| Consumption   | Air                      | 1        | 4    | 5    | 0        | 2    | 2    | 0       | 1    | 1   |
| Consumption   | Surface water            | 41       | 157  | 203  | 17       | 68   | 91   | 2       | 38   | 40  |
| Consumption   | Natural & urban soil     | 1        | 4    | 5    | 0        | 2    | 2    | 0       | 1    | 1   |
| Consumption   | Landfill                 | 22       | 92   | 115  | 10       | 42   | 55   | 2       | 35   | 36  |
| Consumption   | Waste incineration plant | 4        | 17   | 21   | 4        | 17   | 23   | 0       | 0    | 0   |
| Consumption   | Recycling systems        | 69       | 296  | 372  | 25       | 114  | 147  | 3       | 63   | 65  |
| Wastewater    | WWTP                     | 395      | 1403 | 1835 | 160      | 601  | 832  | 19      | 338  | 353 |
| Wastewater    | Surface water            | 13       | 46   | 59   | 5        | 20   | 27   | 1       | 11   | 12  |
| WWTP          | Sludge                   | 243      | 1066 | 1333 | 97       | 460  | 581  | 14      | 258  | 266 |
| WWTP          | Surface water            | 51       | 337  | 363  | 18       | 142  | 150  | 3       | 80   | 83  |
| Sludge        | Sludge-treated soil      | 117      | 512  | 639  | 87       | 413  | 522  | 1       | 21   | 22  |
| Sludge        | Landfill                 | 42       | 151  | 196  | 13       | 46   | 65   | 13      | 235  | 244 |
| Sludge        | Waste incineration plant | 94       | 403  | 505  | 1        | 0    | 2    | 0       | 2    | 2   |
|               |                          | Slovakia |      |      | Slovenia |      |      | Sweden  |      |     |
| From          | To                       | Q25      | Mean | Q75  | Q25      | Mean | Q75  | Q25     | Mean | Q75 |
| Import        | Manufacturing            | 11       | 195  | 197  | 0        | 0    | 0    | 46      | 802  | 831 |
| Import        | Consumption              | 23       | 421  | 435  | 2        | 48   | 49   | 0       | 0    | 0   |
| Production    | Manufacturing            | 0        | 0    | 0    | 1        | 35   | 36   | 0       | 0    | 0   |
| Production    | Wastewater               | 0        | 0    | 0    | 5        | 97   | 99   | 0       | 0    | 0   |
| Production    | Air                      | 0        | 0    | 0    | 0        | 0    | 0    | 0       | 0    | 0   |
| Production    | Export                   | 0        | 0    | 0    | 275      | 4808 | 4931 | 0       | 0    | 0   |
| Manufacturing | Consumption              | 124      | 195  | 391  | 16       | 35   | 57   | 34      | 612  | 633 |
| Manufacturing | Wastewater               | 0        | 0    | 0    | 0        | 0    | 0    | 0       | 1    | 1   |
| Manufacturing | Air                      | 0        | 0    | 0    | 0        | 0    | 0    | 0       | 0    | 0   |
| Manufacturing | Recycling systems        | 0        | 0    | 0    | 0        | 0    | 0    | 0       | 1    | 1   |
| Manufacturing | Export                   | 0        | 0    | 0    | 0        | 0    | 0    | 6       | 188  | 194 |
| Consumption   | Wastewater               | 103      | 441  | 586  | 12       | 60   | 76   | 24      | 439  | 454 |
| Consumption   | Air                      | 0        | 1    | 2    | 0        | 0    | 0    | 0       | 1    | 1   |
| Consumption   | Surface water            | 11       | 48   | 63   | 1        | 6    | 8    | 3       | 48   | 50  |
| Consumption   | Natural & urban soil     | 0        | 1    | 2    | 0        | 0    | 0    | 0       | 1    | 1   |
| Consumption   | Landfill                 | 6        | 31   | 40   | 1        | 4    | 5    | 0       | 0    | 0   |
| Consumption   | Waste incineration plant | 1        | 5    | 7    | 0        | 0    | 0    | 1       | 23   | 24  |
| Consumption   | Recycling systems        | 18       | 87   | 110  | 2        | 13   | 16   | 5       | 99   | 103 |
| Wastewater    | WWTP                     | 102      | 427  | 573  | 12       | 58   | 74   | 24      | 425  | 441 |
| Wastewater    | Surface water            | 3        | 14   | 18   | 0        | 2    | 2    | 1       | 14   | 14  |
| WWTP          | Sludge                   | 64       | 325  | 411  | 7        | 44   | 53   | 16      | 324  | 330 |
| WWTP          | Surface water            | 13       | 102  | 107  | 2        | 14   | 14   | 3       | 101  | 105 |
| Sludge        | Sludge-treated soil      | 0        | 0    | 0    | 0        | 1    | 1    | 15      | 291  | 297 |
| Sludge        | Landfill                 | 16       | 69   | 90   | 0        | 1    | 1    | 1       | 21   | 21  |
| Sludge        | Waste incineration plant | 51       | 256  | 325  | 7        | 43   | 51   | 1       | 13   | 13  |

Table S14: 25<sup>th</sup> quantiles, means and 75<sup>th</sup> quantiles of flows of nano-ZnO (tonnes)

| From          | To                       | Austria     |      |     | Belgium |      |     | Bulgaria       |      |     |
|---------------|--------------------------|-------------|------|-----|---------|------|-----|----------------|------|-----|
|               |                          | Q25         | Mean | Q75 | Q25     | Mean | Q75 | Q25            | Mean | Q75 |
| Import        | Manufacturing            | 16          | 101  | 113 | 0       | 0    | 0   | 6              | 27   | 31  |
| Import        | Consumption              | 1           | 25   | 28  | 0       | 0    | 0   | 1              | 9    | 10  |
| Production    | Manufacturing            | 0           | 0    | 0   | 35      | 184  | 205 | 0              | 0    | 0   |
| Production    | Wastewater               | 0           | 0    | 0   | 1       | 15   | 17  | 0              | 0    | 0   |
| Production    | Air                      | 0           | 0    | 0   | 0       | 0    | 0   | 0              | 0    | 0   |
| Production    | Export                   | 0           | 0    | 0   | 111     | 585  | 653 | 0              | 0    | 0   |
| Manufacturing | Consumption              | 38          | 101  | 119 | 29      | 152  | 170 | 11             | 27   | 33  |
| Manufacturing | Wastewater               | 0           | 0    | 0   | 0       | 0    | 0   | 0              | 0    | 0   |
| Manufacturing | Air                      | 0           | 0    | 0   | 0       | 0    | 0   | 0              | 0    | 0   |
| Manufacturing | Export                   | 0           | 0    | 0   | 0       | 31   | 36  | 0              | 0    | 0   |
| Consumption   | Wastewater               | 28          | 93   | 109 | 21      | 112  | 125 | 9              | 27   | 32  |
| Consumption   | Air                      | 0           | 2    | 2   | 0       | 2    | 2   | 0              | 0    | 1   |
| Consumption   | Surface water            | 3           | 11   | 13  | 2       | 14   | 15  | 1              | 3    | 4   |
| Consumption   | Natural & urban soil     | 0           | 2    | 2   | 0       | 2    | 2   | 0              | 0    | 1   |
| Consumption   | Landfill                 | 0           | 0    | 0   | 0       | 0    | 0   | 0              | 1    | 1   |
| Consumption   | Waste incineration plant | 1           | 2    | 3   | 0       | 3    | 3   | 0              | 0    | 0   |
| Consumption   | Recycling                | 5           | 16   | 18  | 3       | 19   | 21  | 1              | 4    | 5   |
| Wastewater    | WWTP                     | 28          | 90   | 106 | 24      | 127  | 142 | 8              | 26   | 31  |
| Wastewater    | Surface water            | 1           | 3    | 4   | 1       | 4    | 5   | 0              | 1    | 1   |
| WWTP          | Sludge                   | 16          | 69   | 82  | 9       | 97   | 110 | 5              | 20   | 24  |
| WWTP          | Surface water            | 3           | 22   | 24  | 2       | 30   | 31  | 1              | 6    | 7   |
| Sludge        | Sludge-treated soil      | 4           | 17   | 20  | 1       | 13   | 15  | 3              | 13   | 16  |
| Sludge        | Landfill                 | 0           | 1    | 2   | 0       | 0    | 0   | 2              | 7    | 8   |
| Sludge        | Waste incineration plant | 12          | 50   | 61  | 8       | 84   | 96  | 0              | 0    | 0   |
| From          | To                       | Switzerland |      |     | Cyprus  |      |     | Czech Republic |      |     |
|               |                          | Q25         | Mean | Q75 | Q25     | Mean | Q75 | Q25            | Mean | Q75 |
| Import        | Manufacturing            | 31          | 167  | 188 | 0       | 0    | 0   | 11             | 55   | 61  |
| Import        | Consumption              | 0           | 0    | 0   | 5       | 25   | 28  | 12             | 72   | 81  |
| Production    | Manufacturing            | 0           | 0    | 0   | 0       | 0    | 0   | 6              | 5    | 6   |
| Production    | Wastewater               | 0           | 0    | 0   | 0       | 0    | 0   | 0              | 0    | 0   |
| Production    | Air                      | 0           | 0    | 0   | 0       | 0    | 0   | 0              | 0    | 0   |
| Production    | Export                   | 0           | 0    | 0   | 0       | 0    | 0   | 0              | 0    | 0   |
| Manufacturing | Consumption              | 19          | 107  | 120 | 0       | 0    | 0   | 38             | 60   | 81  |
| Manufacturing | Wastewater               | 0           | 0    | 0   | 0       | 0    | 0   | 0              | 0    | 0   |
| Manufacturing | Air                      | 0           | 0    | 0   | 0       | 0    | 0   | 0              | 0    | 0   |
| Manufacturing | Export                   | 9           | 60   | 68  | 0       | 0    | 0   | 0              | 0    | 0   |
| Consumption   | Wastewater               | 14          | 79   | 89  | 3       | 18   | 20  | 37             | 98   | 120 |
| Consumption   | Air                      | 0           | 1    | 2   | 0       | 0    | 0   | 1              | 2    | 2   |
| Consumption   | Surface water            | 2           | 10   | 11  | 0       | 2    | 3   | 4              | 12   | 15  |
| Consumption   | Natural & urban soil     | 0           | 1    | 2   | 0       | 0    | 0   | 1              | 2    | 2   |
| Consumption   | Landfill                 | 0           | 0    | 0   | 0       | 1    | 1   | 2              | 4    | 5   |
| Consumption   | Waste incineration plant | 0           | 1    | 1   | 0       | 0    | 0   | 0              | 1    | 1   |
| Consumption   | Recycling                | 2           | 14   | 16  | 1       | 3    | 3   | 5              | 14   | 17  |
| Wastewater    | WWTP                     | 14          | 77   | 86  | 3       | 18   | 20  | 36             | 95   | 117 |
| Wastewater    | Surface water            | 0           | 3    | 3   | 0       | 1    | 1   | 1              | 3    | 4   |
| WWTP          | Sludge                   | 5           | 59   | 67  | 1       | 14   | 15  | 22             | 73   | 89  |
| WWTP          | Surface water            | 1           | 18   | 18  | 0       | 4    | 4   | 4              | 22   | 27  |
| Sludge        | Sludge-treated soil      | 0           | 0    | 0   | 1       | 14   | 15  | 17             | 58   | 70  |
| Sludge        | Landfill                 | 0           | 0    | 0   | 0       | 0    | 0   | 3              | 10   | 13  |
| Sludge        | Waste incineration plant | 6           | 59   | 67  | 0       | 0    | 0   | 1              | 5    | 6   |

Table S14 (continued): 25<sup>th</sup> quantiles, means and 75<sup>th</sup> quantiles of flows of nano-ZnO (tonnes)

|               |                          | Germany |      |      | Denmark |      |     | Spain  |      |      |
|---------------|--------------------------|---------|------|------|---------|------|-----|--------|------|------|
| From          | To                       | Q25     | Mean | Q75  | Q25     | Mean | Q75 | Q25    | Mean | Q75  |
| Import        | Manufacturing            | 0       | 0    | 0    | 16      | 84   | 93  | 108    | 588  | 661  |
| Import        | Consumption              | 0       | 0    | 0    | 0       | 0    | 0   | 66     | 458  | 516  |
| Production    | Manufacturing            | 218     | 1219 | 1359 | 0       | 0    | 0   | 4      | 5    | 5    |
| Production    | Wastewater               | 5       | 61   | 68   | 0       | 0    | 0   | 0      | 0    | 0    |
| Production    | Air                      | 0       | 0    | 0    | 0       | 0    | 0   | 0      | 0    | 0    |
| Production    | Export                   | 310     | 1810 | 2027 | 0       | 0    | 0   | 0      | 0    | 0    |
| Manufacturing | Consumption              | 108     | 614  | 684  | 13      | 72   | 80  | 302    | 593  | 772  |
| Manufacturing | Wastewater               | 0       | 2    | 2    | 0       | 0    | 0   | 0      | 1    | 1    |
| Manufacturing | Air                      | 0       | 0    | 0    | 0       | 0    | 0   | 0      | 0    | 0    |
| Manufacturing | Export                   | 98      | 603  | 676  | 0       | 12   | 14  | 0      | 0    | 0    |
| Consumption   | Wastewater               | 78      | 454  | 506  | 9       | 53   | 59  | 270    | 777  | 953  |
| Consumption   | Air                      | 1       | 8    | 9    | 0       | 1    | 1   | 4      | 13   | 16   |
| Consumption   | Surface water            | 8       | 56   | 62   | 1       | 7    | 7   | 31     | 96   | 119  |
| Consumption   | Natural & urban soil     | 1       | 8    | 9    | 0       | 1    | 1   | 4      | 13   | 17   |
| Consumption   | Landfill                 | 0       | 0    | 0    | 0       | 1    | 1   | 12     | 37   | 46   |
| Consumption   | Waste incineration plant | 1       | 9    | 10   | 0       | 1    | 1   | 2      | 6    | 8    |
| Consumption   | Recycling                | 13      | 79   | 88   | 1       | 9    | 10  | 36     | 108  | 133  |
| Wastewater    | WWTP                     | 90      | 512  | 570  | 9       | 51   | 57  | 263    | 753  | 923  |
| Wastewater    | Surface water            | 3       | 17   | 19   | 0       | 2    | 2   | 9      | 25   | 30   |
| WWTP          | Sludge                   | 36      | 390  | 449  | 4       | 39   | 45  | 162    | 573  | 700  |
| WWTP          | Surface water            | 9       | 122  | 124  | 1       | 12   | 12  | 33     | 181  | 212  |
| Sludge        | Sludge-treated soil      | 11      | 119  | 136  | 3       | 27   | 30  | 130    | 457  | 559  |
| Sludge        | Landfill                 | 0       | 0    | 0    | 0       | 1    | 1   | 29     | 92   | 113  |
| Sludge        | Waste incineration plant | 26      | 272  | 312  | 1       | 12   | 14  | 7      | 24   | 30   |
|               |                          | Estonia |      |      | Finland |      |     | France |      |      |
| From          | To                       | Q25     | Mean | Q75  | Q25     | Mean | Q75 | Q25    | Mean | Q75  |
| Import        | Manufacturing            | 3       | 13   | 14   | 14      | 75   | 83  | 138    | 795  | 888  |
| Import        | Consumption              | 0       | 0    | 0    | 0       | 0    | 0   | 0      | 0    | 0    |
| Production    | Manufacturing            | 0       | 0    | 0    | 0       | 0    | 0   | 252    | 359  | 523  |
| Production    | Wastewater               | 0       | 0    | 0    | 0       | 0    | 0   | 1      | 7    | 8    |
| Production    | Air                      | 0       | 0    | 0    | 0       | 0    | 0   | 0      | 0    | 0    |
| Production    | Export                   | 0       | 0    | 0    | 0       | 0    | 0   | 0      | 0    | 0    |
| Manufacturing | Consumption              | 3       | 13   | 14   | 12      | 65   | 72  | 307    | 930  | 1137 |
| Manufacturing | Wastewater               | 0       | 0    | 0    | 0       | 0    | 0   | 1      | 2    | 2    |
| Manufacturing | Air                      | 0       | 0    | 0    | 0       | 0    | 0   | 0      | 0    | 0    |
| Manufacturing | Export                   | 0       | 0    | 0    | 0       | 10   | 12  | 45     | 222  | 277  |
| Consumption   | Wastewater               | 2       | 10   | 11   | 9       | 48   | 53  | 225    | 688  | 842  |
| Consumption   | Air                      | 0       | 0    | 0    | 0       | 1    | 1   | 4      | 12   | 14   |
| Consumption   | Surface water            | 0       | 1    | 1    | 1       | 6    | 7   | 26     | 85   | 103  |
| Consumption   | Natural & urban soil     | 0       | 0    | 0    | 0       | 1    | 1   | 3      | 12   | 14   |
| Consumption   | Landfill                 | 0       | 0    | 0    | 0       | 0    | 0   | 3      | 10   | 12   |
| Consumption   | Waste incineration plant | 0       | 0    | 0    | 0       | 0    | 0   | 4      | 13   | 16   |
| Consumption   | Recycling                | 0       | 1    | 2    | 2       | 9    | 10  | 35     | 110  | 135  |
| Wastewater    | WWTP                     | 2       | 9    | 10   | 9       | 46   | 52  | 224    | 675  | 829  |
| Wastewater    | Surface water            | 0       | 0    | 0    | 0       | 2    | 2   | 7      | 22   | 28   |
| WWTP          | Sludge                   | 1       | 7    | 8    | 3       | 35   | 40  | 137    | 514  | 629  |
| WWTP          | Surface water            | 0       | 2    | 2    | 1       | 11   | 11  | 28     | 162  | 182  |
| Sludge        | Sludge-treated soil      | 0       | 1    | 1    | 0       | 5    | 6   | 93     | 347  | 425  |
| Sludge        | Landfill                 | 1       | 6    | 7    | 1       | 7    | 8   | 8      | 26   | 32   |
| Sludge        | Waste incineration plant | 0       | 0    | 0    | 2       | 23   | 26  | 39     | 141  | 173  |

Table S14 (continued): 25<sup>th</sup> quantiles, means and 75<sup>th</sup> quantiles of flows of nano-ZnO (tonnes)

|               |                          | United Kingdom |      |      | Greece  |      |     | Croatia |      |      |
|---------------|--------------------------|----------------|------|------|---------|------|-----|---------|------|------|
| From          | To                       | Q25            | Mean | Q75  | Q25     | Mean | Q75 | Q25     | Mean | Q75  |
| Import        | Manufacturing            | 94             | 526  | 586  | 13      | 65   | 72  | 7       | 33   | 37   |
| Import        | Consumption              | 6              | 141  | 155  | 17      | 97   | 109 | 1       | 14   | 16   |
| Production    | Manufacturing            | 221            | 367  | 515  | 0       | 0    | 0   | 0       | 0    | 0    |
| Production    | Wastewater               | 1              | 7    | 8    | 0       | 0    | 0   | 0       | 0    | 0    |
| Production    | Air                      | 0              | 0    | 0    | 0       | 0    | 0   | 0       | 0    | 0    |
| Production    | Export                   | 0              | 0    | 0    | 0       | 0    | 0   | 0       | 0    | 0    |
| Manufacturing | Consumption              | 410            | 892  | 1165 | 39      | 65   | 92  | 15      | 33   | 41   |
| Manufacturing | Wastewater               | 0              | 1    | 2    | 0       | 0    | 0   | 0       | 0    | 0    |
| Manufacturing | Air                      | 0              | 0    | 0    | 0       | 0    | 0   | 0       | 0    | 0    |
| Manufacturing | Export                   | 0              | 0    | 0    | 0       | 0    | 0   | 0       | 0    | 0    |
| Consumption   | Wastewater               | 304            | 765  | 976  | 42      | 120  | 148 | 12      | 35   | 41   |
| Consumption   | Air                      | 5              | 13   | 17   | 1       | 2    | 3   | 0       | 1    | 1    |
| Consumption   | Surface water            | 35             | 94   | 120  | 5       | 15   | 18  | 1       | 4    | 5    |
| Consumption   | Natural & urban soil     | 5              | 13   | 17   | 1       | 2    | 3   | 0       | 1    | 1    |
| Consumption   | Landfill                 | 6              | 15   | 20   | 1       | 4    | 5   | 0       | 1    | 2    |
| Consumption   | Waste incineration plant | 4              | 11   | 15   | 0       | 0    | 0   | 0       | 0    | 0    |
| Consumption   | Recycling                | 47             | 122  | 155  | 6       | 19   | 24  | 2       | 5    | 6    |
| Wastewater    | WWTP                     | 301            | 750  | 957  | 41      | 116  | 144 | 11      | 34   | 40   |
| Wastewater    | Surface water            | 10             | 25   | 32   | 1       | 4    | 5   | 0       | 1    | 1    |
| WWTP          | Sludge                   | 186            | 571  | 717  | 25      | 88   | 108 | 7       | 26   | 31   |
| WWTP          | Surface water            | 37             | 178  | 205  | 5       | 27   | 32  | 1       | 8    | 9    |
| Sludge        | Sludge-treated soil      | 146            | 447  | 562  | 6       | 20   | 25  | 0       | 1    | 2    |
| Sludge        | Landfill                 | 1              | 3    | 3    | 10      | 34   | 42  | 7       | 25   | 30   |
| Sludge        | Waste incineration plant | 41             | 121  | 152  | 9       | 34   | 41  | 0       | 0    | 0    |
|               |                          | Hungary        |      |      | Ireland |      |     | Italy   |      |      |
| From          | To                       | Q25            | Mean | Q75  | Q25     | Mean | Q75 | Q25     | Mean | Q75  |
| Import        | Manufacturing            | 10             | 50   | 56   | 14      | 70   | 77  | 102     | 537  | 599  |
| Import        | Consumption              | 0              | 7    | 8    | 0       | 0    | 0   | 16      | 262  | 293  |
| Production    | Manufacturing            | 0              | 0    | 0    | 0       | 0    | 0   | 192     | 304  | 431  |
| Production    | Wastewater               | 0              | 0    | 0    | 0       | 0    | 0   | 1       | 6    | 7    |
| Production    | Air                      | 0              | 0    | 0    | 0       | 0    | 0   | 0       | 0    | 0    |
| Production    | Export                   | 0              | 0    | 0    | 0       | 0    | 0   | 0       | 0    | 0    |
| Manufacturing | Consumption              | 16             | 50   | 57   | 9       | 46   | 51  | 439     | 840  | 1139 |
| Manufacturing | Wastewater               | 0              | 0    | 0    | 0       | 0    | 0   | 0       | 1    | 1    |
| Manufacturing | Air                      | 0              | 0    | 0    | 0       | 0    | 0   | 0       | 0    | 0    |
| Manufacturing | Export                   | 0              | 0    | 0    | 3       | 24   | 27  | 0       | 0    | 0    |
| Consumption   | Wastewater               | 12             | 42   | 48   | 6       | 34   | 38  | 334     | 814  | 1056 |
| Consumption   | Air                      | 0              | 1    | 1    | 0       | 1    | 1   | 5       | 14   | 18   |
| Consumption   | Surface water            | 1              | 5    | 6    | 1       | 4    | 5   | 39      | 101  | 129  |
| Consumption   | Natural & urban soil     | 0              | 1    | 1    | 0       | 1    | 1   | 5       | 14   | 18   |
| Consumption   | Landfill                 | 1              | 2    | 2    | 0       | 0    | 0   | 4       | 10   | 12   |
| Consumption   | Waste incineration plant | 0              | 0    | 0    | 0       | 0    | 0   | 4       | 9    | 12   |
| Consumption   | Recycling                | 2              | 6    | 7    | 1       | 6    | 7   | 56      | 139  | 180  |
| Wastewater    | WWTP                     | 12             | 41   | 47   | 6       | 33   | 37  | 329     | 796  | 1035 |
| Wastewater    | Surface water            | 0              | 1    | 2    | 0       | 1    | 1   | 11      | 26   | 34   |
| WWTP          | Sludge                   | 6              | 31   | 37   | 2       | 25   | 29  | 206     | 609  | 780  |
| WWTP          | Surface water            | 1              | 10   | 10   | 1       | 8    | 8   | 40      | 188  | 219  |
| Sludge        | Sludge-treated soil      | 1              | 4    | 5    | 2       | 25   | 28  | 79      | 236  | 302  |
| Sludge        | Landfill                 | 1              | 4    | 5    | 0       | 0    | 0   | 118     | 345  | 441  |
| Sludge        | Waste incineration plant | 5              | 23   | 27   | 0       | 0    | 0   | 10      | 27   | 35   |

Table S14 (continued): 25<sup>th</sup> quantiles, means and 75<sup>th</sup> quantiles of flows of nano-ZnO (tonnes)

| From          | To                       | Lithuania |      |     | Luxemburg   |      |     | Latvia |      |     |
|---------------|--------------------------|-----------|------|-----|-------------|------|-----|--------|------|-----|
|               |                          | Q25       | Mean | Q75 | Q25         | Mean | Q75 | Q25    | Mean | Q75 |
| Import        | Manufacturing            | 4         | 19   | 21  | 11          | 54   | 60  | 2      | 12   | 14  |
| Import        | Consumption              | 0         | 3    | 3   | 0           | 0    | 0   | 0      | 4    | 4   |
| Production    | Manufacturing            | 0         | 0    | 0   | 0           | 0    | 0   | 0      | 0    | 0   |
| Production    | Wastewater               | 0         | 0    | 0   | 0           | 0    | 0   | 0      | 0    | 0   |
| Production    | Air                      | 0         | 0    | 0   | 0           | 0    | 0   | 0      | 0    | 0   |
| Production    | Export                   | 0         | 0    | 0   | 0           | 0    | 0   | 0      | 0    | 0   |
| Manufacturing | Consumption              | 6         | 19   | 22  | 2           | 10   | 11  | 5      | 12   | 15  |
| Manufacturing | Wastewater               | 0         | 0    | 0   | 0           | 0    | 0   | 0      | 0    | 0   |
| Manufacturing | Air                      | 0         | 0    | 0   | 0           | 0    | 0   | 0      | 0    | 0   |
| Manufacturing | Export                   | 0         | 0    | 0   | 9           | 44   | 49  | 0      | 0    | 0   |
| Consumption   | Wastewater               | 5         | 16   | 18  | 1           | 7    | 8   | 4      | 12   | 14  |
| Consumption   | Air                      | 0         | 0    | 0   | 0           | 0    | 0   | 0      | 0    | 0   |
| Consumption   | Surface water            | 1         | 2    | 2   | 0           | 1    | 1   | 0      | 1    | 2   |
| Consumption   | Natural & urban soil     | 0         | 0    | 0   | 0           | 0    | 0   | 0      | 0    | 0   |
| Consumption   | Landfill                 | 0         | 1    | 1   | 0           | 0    | 0   | 0      | 0    | 1   |
| Consumption   | Waste incineration plant | 0         | 0    | 0   | 0           | 0    | 0   | 0      | 0    | 0   |
| Consumption   | Recycling                | 1         | 3    | 3   | 0           | 1    | 1   | 1      | 2    | 2   |
| Wastewater    | WWTP                     | 4         | 16   | 18  | 1           | 7    | 8   | 4      | 11   | 13  |
| Wastewater    | Surface water            | 0         | 1    | 1   | 0           | 0    | 0   | 0      | 0    | 0   |
| WWTP          | Sludge                   | 2         | 12   | 14  | 1           | 5    | 6   | 2      | 9    | 10  |
| WWTP          | Surface water            | 1         | 4    | 4   | 0           | 2    | 2   | 0      | 3    | 3   |
| Sludge        | Sludge-treated soil      | 2         | 12   | 14  | 0           | 4    | 5   | 2      | 8    | 10  |
| Sludge        | Landfill                 | 0         | 0    | 0   | 0           | 0    | 0   | 0      | 0    | 0   |
| Sludge        | Waste incineration plant | 0         | 0    | 0   | 0           | 1    | 1   | 0      | 0    | 0   |
|               |                          | Malta     |      |     | Netherlands |      |     | Norway |      |     |
| From          | To                       | Q25       | Mean | Q75 | Q25         | Mean | Q75 | Q25    | Mean | Q75 |
| Import        | Manufacturing            | 0         | 1    | 1   | 0           | 0    | 0   | 0      | 0    | 0   |
| Import        | Consumption              | 1         | 7    | 8   | 0           | 0    | 0   | 0      | 0    | 0   |
| Production    | Manufacturing            | 0         | 0    | 0   | 45          | 230  | 255 | 13     | 69   | 77  |
| Production    | Wastewater               | 0         | 0    | 0   | 2           | 22   | 24  | 1      | 16   | 17  |
| Production    | Air                      | 0         | 0    | 0   | 0           | 0    | 0   | 0      | 0    | 0   |
| Production    | Export                   | 0         | 0    | 0   | 164         | 848  | 939 | 134    | 706  | 785 |
| Manufacturing | Consumption              | 1         | 1    | 1   | 33          | 172  | 192 | 12     | 67   | 75  |
| Manufacturing | Wastewater               | 0         | 0    | 0   | 0           | 0    | 0   | 0      | 0    | 0   |
| Manufacturing | Air                      | 0         | 0    | 0   | 0           | 0    | 0   | 0      | 0    | 0   |
| Manufacturing | Export                   | 0         | 0    | 0   | 3           | 58   | 65  | 0      | 2    | 4   |
| Consumption   | Wastewater               | 2         | 6    | 7   | 24          | 128  | 142 | 9      | 50   | 56  |
| Consumption   | Air                      | 0         | 0    | 0   | 0           | 2    | 2   | 0      | 1    | 1   |
| Consumption   | Surface water            | 0         | 1    | 1   | 3           | 16   | 17  | 1      | 6    | 7   |
| Consumption   | Natural & urban soil     | 0         | 0    | 0   | 0           | 2    | 2   | 0      | 1    | 1   |
| Consumption   | Landfill                 | 0         | 0    | 0   | 0           | 0    | 0   | 0      | 0    | 0   |
| Consumption   | Waste incineration plant | 0         | 0    | 0   | 1           | 3    | 3   | 0      | 2    | 2   |
| Consumption   | Recycling                | 0         | 1    | 1   | 4           | 22   | 24  | 1      | 8    | 9   |
| Wastewater    | WWTP                     | 2         | 6    | 7   | 29          | 149  | 165 | 13     | 66   | 74  |
| Wastewater    | Surface water            | 0         | 0    | 0   | 1           | 5    | 5   | 0      | 2    | 2   |
| WWTP          | Sludge                   | 1         | 4    | 5   | 11          | 113  | 129 | 5      | 51   | 58  |
| WWTP          | Surface water            | 0         | 1    | 1   | 3           | 36   | 36  | 1      | 16   | 16  |
| Sludge        | Sludge-treated soil      | 0         | 0    | 0   | 0           | 0    | 0   | 4      | 42   | 48  |
| Sludge        | Landfill                 | 1         | 4    | 5   | 0           | 0    | 0   | 1      | 9    | 10  |
| Sludge        | Waste incineration plant | 0         | 0    | 0   | 12          | 113  | 130 | 0      | 0    | 0   |

Table S14 (continued): 25<sup>th</sup> quantiles, means and 75<sup>th</sup> quantiles of flows of nano-ZnO (tonnes)

| From          | To                       | Poland   |      |     | Portugal |      |     | Romania |      |     |
|---------------|--------------------------|----------|------|-----|----------|------|-----|---------|------|-----|
|               |                          | Q25      | Mean | Q75 | Q25      | Mean | Q75 | Q25     | Mean | Q75 |
| Import        | Manufacturing            | 52       | 273  | 305 | 19       | 98   | 109 | 18      | 91   | 102 |
| Import        | Consumption              | 2        | 46   | 51  | 8        | 58   | 65  | 0       | 0    | 0   |
| Production    | Manufacturing            | 0        | 0    | 0   | 0        | 0    | 0   | 0       | 0    | 0   |
| Production    | Wastewater               | 0        | 0    | 0   | 0        | 0    | 0   | 0       | 0    | 0   |
| Production    | Air                      | 0        | 0    | 0   | 0        | 0    | 0   | 0       | 0    | 0   |
| Production    | Export                   | 0        | 0    | 0   | 0        | 0    | 0   | 0       | 0    | 0   |
| Manufacturing | Consumption              | 93       | 273  | 317 | 46       | 98   | 123 | 12      | 65   | 72  |
| Manufacturing | Wastewater               | 0        | 0    | 0   | 0        | 0    | 0   | 0       | 0    | 0   |
| Manufacturing | Air                      | 0        | 0    | 0   | 0        | 0    | 0   | 0       | 0    | 0   |
| Manufacturing | Export                   | 0        | 0    | 0   | 0        | 0    | 0   | 2       | 26   | 30  |
| Consumption   | Wastewater               | 69       | 236  | 273 | 39       | 115  | 140 | 9       | 48   | 53  |
| Consumption   | Air                      | 1        | 4    | 5   | 1        | 2    | 2   | 0       | 1    | 1   |
| Consumption   | Surface water            | 8        | 29   | 34  | 5        | 14   | 17  | 1       | 6    | 7   |
| Consumption   | Natural & urban soil     | 1        | 4    | 5   | 1        | 2    | 2   | 0       | 1    | 1   |
| Consumption   | Landfill                 | 2        | 7    | 9   | 1        | 5    | 6   | 0       | 2    | 3   |
| Consumption   | Waste incineration plant | 0        | 1    | 1   | 1        | 2    | 2   | 0       | 0    | 0   |
| Consumption   | Recycling                | 11       | 38   | 44  | 5        | 16   | 20  | 1       | 7    | 8   |
| Wastewater    | WWTP                     | 68       | 229  | 264 | 38       | 112  | 135 | 9       | 46   | 52  |
| Wastewater    | Surface water            | 2        | 8    | 9   | 1        | 4    | 4   | 0       | 2    | 2   |
| WWTP          | Sludge                   | 36       | 175  | 207 | 23       | 85   | 103 | 3       | 35   | 40  |
| WWTP          | Surface water            | 8        | 54   | 59  | 5        | 27   | 31  | 1       | 11   | 11  |
| Sludge        | Sludge-treated soil      | 18       | 84   | 99  | 21       | 76   | 93  | 0       | 3    | 3   |
| Sludge        | Landfill                 | 6        | 25   | 29  | 3        | 9    | 10  | 3       | 32   | 37  |
| Sludge        | Waste incineration plant | 14       | 66   | 78  | 0        | 0    | 0   | 0       | 0    | 0   |
|               |                          | Slovakia |      |     | Slovenia |      |     | Sweden  |      |     |
| From          | To                       | Q25      | Mean | Q75 | Q25      | Mean | Q75 | Q25     | Mean | Q75 |
| Import        | Manufacturing            | 7        | 36   | 41  | 3        | 16   | 18  | 33      | 160  | 176 |
| Import        | Consumption              | 13       | 77   | 86  | 1        | 9    | 10  | 0       | 0    | 0   |
| Production    | Manufacturing            | 0        | 0    | 0   | 0        | 0    | 0   | 0       | 0    | 0   |
| Production    | Wastewater               | 0        | 0    | 0   | 0        | 0    | 0   | 0       | 0    | 0   |
| Production    | Air                      | 0        | 0    | 0   | 0        | 0    | 0   | 0       | 0    | 0   |
| Production    | Export                   | 0        | 0    | 0   | 0        | 0    | 0   | 0       | 0    | 0   |
| Manufacturing | Consumption              | 25       | 36   | 52  | 8        | 16   | 21  | 21      | 107  | 119 |
| Manufacturing | Wastewater               | 0        | 0    | 0   | 0        | 0    | 0   | 0       | 0    | 0   |
| Manufacturing | Air                      | 0        | 0    | 0   | 0        | 0    | 0   | 0       | 0    | 0   |
| Manufacturing | Export                   | 0        | 0    | 0   | 0        | 0    | 0   | 7       | 52   | 58  |
| Consumption   | Wastewater               | 28       | 84   | 103 | 6        | 19   | 23  | 15      | 80   | 88  |
| Consumption   | Air                      | 0        | 1    | 2   | 0        | 0    | 0   | 0       | 1    | 2   |
| Consumption   | Surface water            | 3        | 10   | 13  | 1        | 2    | 3   | 2       | 10   | 11  |
| Consumption   | Natural & urban soil     | 0        | 1    | 2   | 0        | 0    | 0   | 0       | 1    | 2   |
| Consumption   | Landfill                 | 1        | 3    | 3   | 0        | 0    | 1   | 0       | 0    | 0   |
| Consumption   | Waste incineration plant | 0        | 0    | 1   | 0        | 0    | 0   | 0       | 1    | 1   |
| Consumption   | Recycling                | 4        | 13   | 16  | 1        | 3    | 4   | 3       | 14   | 16  |
| Wastewater    | WWTP                     | 28       | 81   | 100 | 6        | 18   | 22  | 15      | 77   | 85  |
| Wastewater    | Surface water            | 1        | 3    | 3   | 0        | 1    | 1   | 0       | 3    | 3   |
| WWTP          | Sludge                   | 17       | 62   | 76  | 4        | 14   | 17  | 6       | 59   | 67  |
| WWTP          | Surface water            | 3        | 19   | 22  | 1        | 4    | 5   | 1       | 18   | 19  |
| Sludge        | Sludge-treated soil      | 0        | 0    | 0   | 0        | 0    | 0   | 6       | 53   | 60  |
| Sludge        | Landfill                 | 4        | 13   | 16  | 0        | 0    | 0   | 0       | 4    | 4   |
| Sludge        | Waste incineration plant | 13       | 49   | 60  | 4        | 13   | 16  | 0       | 2    | 3   |

Table S15: 25<sup>th</sup> quantiles, means and 75<sup>th</sup> quantiles of flows of nano-Ag (tonnes)

|               |                          | Austria     |       |       | Belgium |       |       | Bulgaria       |       |       |
|---------------|--------------------------|-------------|-------|-------|---------|-------|-------|----------------|-------|-------|
| From          | To                       | Q25         | Mean  | Q75   | Q25     | Mean  | Q75   | Q25            | Mean  | Q75   |
| Import        | Manufacturing            | 0.004       | 0.017 | 0.024 | 0.000   | 0.000 | 0.000 | 0.002          | 0.006 | 0.008 |
| Import        | Consumption              | 0.082       | 0.333 | 0.459 | 0.064   | 0.292 | 0.388 | 0.011          | 0.047 | 0.064 |
| Production    | Manufacturing            | 0.009       | 0.053 | 0.064 | 0.032   | 0.124 | 0.176 | 0.007          | 0.052 | 0.064 |
| Production    | Wastewater               | 0.000       | 0.001 | 0.001 | 0.002   | 0.012 | 0.015 | 0.000          | 0.001 | 0.001 |
| Production    | Export                   | 0.000       | 0.000 | 0.000 | 0.114   | 0.476 | 0.648 | 0.000          | 0.000 | 0.000 |
| Manufacturing | Consumption              | 0.019       | 0.068 | 0.099 | 0.038   | 0.122 | 0.186 | 0.012          | 0.057 | 0.075 |
| Manufacturing | Wastewater               | 0.000       | 0.000 | 0.000 | 0.000   | 0.000 | 0.000 | 0.000          | 0.000 | 0.000 |
| Manufacturing | Recycling system         | 0.000       | 0.001 | 0.001 | 0.000   | 0.002 | 0.002 | 0.000          | 0.001 | 0.001 |
| Manufacturing | Export                   | 0.000       | 0.000 | 0.000 | 0.000   | 0.000 | 0.000 | 0.000          | 0.000 | 0.000 |
| Consumption   | Wastewater               | 0.004       | 0.019 | 0.026 | 0.004   | 0.020 | 0.026 | 0.001          | 0.005 | 0.006 |
| Consumption   | Air                      | 0.001       | 0.003 | 0.004 | 0.001   | 0.003 | 0.004 | 0.000          | 0.001 | 0.001 |
| Consumption   | Surface water            | 0.000       | 0.001 | 0.001 | 0.000   | 0.001 | 0.001 | 0.000          | 0.000 | 0.000 |
| Consumption   | Natural & urban soil     | 0.000       | 0.002 | 0.002 | 0.000   | 0.002 | 0.002 | 0.000          | 0.000 | 0.001 |
| Consumption   | Landfill                 | 0.001       | 0.005 | 0.007 | 0.000   | 0.001 | 0.002 | 0.007          | 0.031 | 0.041 |
| Consumption   | Waste incineration plant | 0.015       | 0.061 | 0.083 | 0.019   | 0.081 | 0.110 | 0.001          | 0.005 | 0.007 |
| Consumption   | Recycling system         | 0.077       | 0.310 | 0.429 | 0.075   | 0.306 | 0.422 | 0.014          | 0.061 | 0.082 |
| Wastewater    | WWTP                     | 0.005       | 0.020 | 0.027 | 0.008   | 0.031 | 0.042 | 0.001          | 0.006 | 0.008 |
| Wastewater    | Surface water            | 0.000       | 0.001 | 0.001 | 0.000   | 0.001 | 0.001 | 0.000          | 0.000 | 0.000 |
| WWTP          | Sludge                   | 0.004       | 0.017 | 0.022 | 0.006   | 0.026 | 0.035 | 0.001          | 0.005 | 0.006 |
| WWTP          | Surface water            | 0.000       | 0.003 | 0.003 | 0.000   | 0.005 | 0.005 | 0.000          | 0.001 | 0.001 |
| Sludge        | Sludge-treated soil      | 0.001       | 0.004 | 0.005 | 0.001   | 0.004 | 0.005 | 0.001          | 0.003 | 0.004 |
| Sludge        | Landfill                 | 0.000       | 0.000 | 0.001 | 0.000   | 0.000 | 0.000 | 0.001          | 0.002 | 0.002 |
| Sludge        | Waste incineration plant | 0.004       | 0.012 | 0.018 | 0.006   | 0.023 | 0.034 | 0.000          | 0.000 | 0.000 |
|               |                          | Switzerland |       |       | Cyprus  |       |       | Czech Republic |       |       |
| From          | To                       | Q25         | Mean  | Q75   | Q25     | Mean  | Q75   | Q25            | Mean  | Q75   |
| Import        | Manufacturing            | 0.000       | 0.000 | 0.000 | 0.000   | 0.001 | 0.001 | 0.002          | 0.009 | 0.013 |
| Import        | Consumption              | 0.000       | 0.000 | 0.000 | 0.005   | 0.019 | 0.026 | 0.042          | 0.168 | 0.231 |
| Production    | Manufacturing            | 0.048       | 0.182 | 0.258 | 0.007   | 0.052 | 0.064 | 0.013          | 0.052 | 0.062 |
| Production    | Wastewater               | 0.001       | 0.005 | 0.007 | 0.000   | 0.001 | 0.001 | 0.000          | 0.001 | 0.001 |
| Production    | Export                   | 0.006       | 0.079 | 0.099 | 0.000   | 0.000 | 0.000 | 0.000          | 0.000 | 0.000 |
| Manufacturing | Consumption              | 0.044       | 0.175 | 0.243 | 0.009   | 0.052 | 0.064 | 0.022          | 0.060 | 0.081 |
| Manufacturing | Wastewater               | 0.000       | 0.000 | 0.000 | 0.000   | 0.000 | 0.000 | 0.000          | 0.000 | 0.000 |
| Manufacturing | Recycling system         | 0.001       | 0.002 | 0.003 | 0.000   | 0.001 | 0.001 | 0.000          | 0.001 | 0.001 |
| Manufacturing | Export                   | 0.000       | 0.004 | 0.020 | 0.000   | 0.000 | 0.000 | 0.000          | 0.000 | 0.000 |
| Consumption   | Wastewater               | 0.002       | 0.008 | 0.011 | 0.001   | 0.003 | 0.004 | 0.003          | 0.011 | 0.014 |
| Consumption   | Air                      | 0.000       | 0.001 | 0.002 | 0.000   | 0.001 | 0.001 | 0.000          | 0.002 | 0.002 |
| Consumption   | Surface water            | 0.000       | 0.000 | 0.001 | 0.000   | 0.000 | 0.000 | 0.000          | 0.001 | 0.001 |
| Consumption   | Natural & urban soil     | 0.000       | 0.001 | 0.001 | 0.000   | 0.000 | 0.000 | 0.000          | 0.001 | 0.001 |
| Consumption   | Landfill                 | 0.000       | 0.000 | 0.000 | 0.008   | 0.038 | 0.049 | 0.014          | 0.053 | 0.070 |
| Consumption   | Waste incineration plant | 0.008       | 0.035 | 0.048 | 0.001   | 0.003 | 0.004 | 0.007          | 0.026 | 0.035 |
| Consumption   | Recycling system         | 0.032       | 0.129 | 0.178 | 0.005   | 0.024 | 0.031 | 0.037          | 0.135 | 0.184 |
| Wastewater    | WWTP                     | 0.003       | 0.013 | 0.018 | 0.001   | 0.004 | 0.005 | 0.003          | 0.012 | 0.016 |
| Wastewater    | Surface water            | 0.000       | 0.000 | 0.001 | 0.000   | 0.000 | 0.000 | 0.000          | 0.000 | 0.001 |
| WWTP          | Sludge                   | 0.003       | 0.011 | 0.015 | 0.001   | 0.004 | 0.004 | 0.002          | 0.010 | 0.013 |
| WWTP          | Surface water            | 0.000       | 0.002 | 0.002 | 0.000   | 0.001 | 0.001 | 0.000          | 0.002 | 0.002 |
| Sludge        | Sludge-treated soil      | 0.000       | 0.000 | 0.000 | 0.001   | 0.004 | 0.004 | 0.002          | 0.008 | 0.010 |
| Sludge        | Landfill                 | 0.000       | 0.000 | 0.000 | 0.000   | 0.000 | 0.000 | 0.001          | 0.001 | 0.003 |
| Sludge        | Waste incineration plant | 0.003       | 0.011 | 0.017 | 0.000   | 0.000 | 0.000 | 0.000          | 0.001 | 0.002 |



Table S15 (continued): 25<sup>th</sup> quantiles, means and 75<sup>th</sup> quantiles of flows of nano-Ag (tonnes)

| From          | To                       | Germany        |       |       | Denmark        |       |       | Spain         |       |       |
|---------------|--------------------------|----------------|-------|-------|----------------|-------|-------|---------------|-------|-------|
|               |                          | Q25            | Mean  | Q75   | Q25            | Mean  | Q75   | Q25           | Mean  | Q75   |
| Import        | Manufacturing            | 0.034          | 0.281 | 0.337 | 0.012          | 0.045 | 0.063 | 0.000         | 0.000 | 0.000 |
| Import        | Consumption              | 0.000          | 0.000 | 0.000 | 0.055          | 0.229 | 0.312 | 0.175         | 0.778 | 1.033 |
| Production    | Manufacturing            | 0.624          | 1.714 | 2.410 | 0.022          | 0.052 | 0.070 | 0.094         | 0.354 | 0.501 |
| Production    | Wastewater               | 0.006          | 0.034 | 0.042 | 0.000          | 0.001 | 0.001 | 0.002         | 0.012 | 0.015 |
| Production    | Export                   | 0.000          | 0.000 | 0.000 | 0.000          | 0.000 | 0.000 | 0.034         | 0.244 | 0.310 |
| Manufacturing | Consumption              | 0.326          | 1.080 | 1.439 | 0.054          | 0.096 | 0.122 | 0.110         | 0.348 | 0.527 |
| Manufacturing | Wastewater               | 0.001          | 0.002 | 0.003 | 0.000          | 0.000 | 0.000 | 0.000         | 0.000 | 0.000 |
| Manufacturing | Recycling system         | 0.000          | 0.000 | 0.000 | 0.000          | 0.001 | 0.002 | 0.001         | 0.005 | 0.007 |
| Manufacturing | Export                   | 0.252          | 0.889 | 1.177 | 0.000          | 0.000 | 0.000 | 0.000         | 0.000 | 0.000 |
| Consumption   | Wastewater               | 0.014          | 0.052 | 0.068 | 0.005          | 0.016 | 0.020 | 0.012         | 0.054 | 0.072 |
| Consumption   | Air                      | 0.002          | 0.008 | 0.011 | 0.001          | 0.002 | 0.003 | 0.002         | 0.009 | 0.011 |
| Consumption   | Surface water            | 0.001          | 0.003 | 0.004 | 0.000          | 0.001 | 0.001 | 0.001         | 0.003 | 0.004 |
| Consumption   | Natural & urban soil     | 0.001          | 0.005 | 0.006 | 0.000          | 0.001 | 0.002 | 0.001         | 0.005 | 0.006 |
| Consumption   | Landfill                 | 0.000          | 0.001 | 0.001 | 0.001          | 0.002 | 0.002 | 0.069         | 0.282 | 0.386 |
| Consumption   | Waste incineration plant | 0.068          | 0.233 | 0.307 | 0.030          | 0.094 | 0.124 | 0.025         | 0.103 | 0.140 |
| Consumption   | Recycling system         | 0.233          | 0.779 | 1.035 | 0.069          | 0.209 | 0.279 | 0.168         | 0.670 | 0.923 |
| Wastewater    | WWTP                     | 0.024          | 0.085 | 0.113 | 0.005          | 0.016 | 0.021 | 0.016         | 0.064 | 0.088 |
| Wastewater    | Surface water            | 0.001          | 0.003 | 0.004 | 0.000          | 0.001 | 0.001 | 0.001         | 0.002 | 0.003 |
| WWTP          | Sludge                   | 0.019          | 0.072 | 0.093 | 0.004          | 0.014 | 0.018 | 0.012         | 0.054 | 0.072 |
| WWTP          | Surface water            | 0.002          | 0.013 | 0.013 | 0.000          | 0.003 | 0.003 | 0.001         | 0.010 | 0.010 |
| Sludge        | Sludge-treated soil      | 0.006          | 0.022 | 0.028 | 0.003          | 0.009 | 0.012 | 0.010         | 0.043 | 0.058 |
| Sludge        | Landfill                 | 0.000          | 0.000 | 0.000 | 0.000          | 0.000 | 0.000 | 0.004         | 0.009 | 0.017 |
| Sludge        | Waste incineration plant | 0.017          | 0.050 | 0.070 | 0.002          | 0.004 | 0.007 | 0.001         | 0.002 | 0.005 |
|               |                          | <b>Estonia</b> |       |       | <b>Finland</b> |       |       | <b>France</b> |       |       |
| From          | To                       | Q25            | Mean  | Q75   | Q25            | Mean  | Q75   | Q25           | Mean  | Q75   |
| Import        | Manufacturing            | 0.000          | 0.001 | 0.001 | 0.000          | 0.000 | 0.000 | 0.102         | 0.387 | 0.554 |
| Import        | Consumption              | 0.005          | 0.021 | 0.029 | 0.041          | 0.171 | 0.228 | 0.451         | 1.893 | 2.570 |
| Production    | Manufacturing            | 0.007          | 0.052 | 0.063 | 0.008          | 0.034 | 0.046 | 0.043         | 0.052 | 0.057 |
| Production    | Wastewater               | 0.000          | 0.001 | 0.001 | 0.002          | 0.012 | 0.015 | 0.000         | 0.001 | 0.001 |
| Production    | Export                   | 0.000          | 0.000 | 0.000 | 0.141          | 0.559 | 0.770 | 0.000         | 0.000 | 0.000 |
| Manufacturing | Consumption              | 0.010          | 0.052 | 0.064 | 0.010          | 0.034 | 0.050 | 0.349         | 0.433 | 0.518 |
| Manufacturing | Wastewater               | 0.000          | 0.000 | 0.000 | 0.000          | 0.000 | 0.000 | 0.000         | 0.000 | 0.000 |
| Manufacturing | Recycling system         | 0.000          | 0.001 | 0.001 | 0.000          | 0.000 | 0.001 | 0.002         | 0.006 | 0.008 |
| Manufacturing | Export                   | 0.000          | 0.000 | 0.000 | 0.000          | 0.000 | 0.000 | 0.000         | 0.000 | 0.000 |
| Consumption   | Wastewater               | 0.001          | 0.004 | 0.004 | 0.002          | 0.010 | 0.013 | 0.035         | 0.112 | 0.145 |
| Consumption   | Air                      | 0.000          | 0.001 | 0.001 | 0.000          | 0.002 | 0.002 | 0.006         | 0.018 | 0.023 |
| Consumption   | Surface water            | 0.000          | 0.000 | 0.000 | 0.000          | 0.001 | 0.001 | 0.002         | 0.006 | 0.008 |
| Consumption   | Natural & urban soil     | 0.000          | 0.000 | 0.000 | 0.000          | 0.001 | 0.001 | 0.003         | 0.010 | 0.013 |
| Consumption   | Landfill                 | 0.001          | 0.005 | 0.006 | 0.002          | 0.008 | 0.010 | 0.049         | 0.151 | 0.196 |
| Consumption   | Waste incineration plant | 0.008          | 0.039 | 0.049 | 0.006          | 0.026 | 0.035 | 0.103         | 0.316 | 0.411 |
| Consumption   | Recycling system         | 0.005          | 0.025 | 0.032 | 0.039          | 0.157 | 0.214 | 0.585         | 1.714 | 2.269 |
| Wastewater    | WWTP                     | 0.001          | 0.004 | 0.006 | 0.005          | 0.021 | 0.028 | 0.037         | 0.110 | 0.144 |
| Wastewater    | Surface water            | 0.000          | 0.000 | 0.000 | 0.000          | 0.001 | 0.001 | 0.001         | 0.004 | 0.005 |
| WWTP          | Sludge                   | 0.001          | 0.004 | 0.005 | 0.004          | 0.018 | 0.023 | 0.029         | 0.093 | 0.120 |
| WWTP          | Surface water            | 0.000          | 0.001 | 0.001 | 0.000          | 0.003 | 0.003 | 0.003         | 0.017 | 0.018 |
| Sludge        | Sludge-treated soil      | 0.000          | 0.000 | 0.000 | 0.001          | 0.003 | 0.003 | 0.020         | 0.063 | 0.081 |
| Sludge        | Landfill                 | 0.001          | 0.003 | 0.004 | 0.001          | 0.004 | 0.005 | 0.003         | 0.005 | 0.008 |
| Sludge        | Waste incineration plant | 0.000          | 0.000 | 0.000 | 0.003          | 0.012 | 0.017 | 0.012         | 0.025 | 0.038 |

Table S15 (continued): 25<sup>th</sup> quantiles, means and 75<sup>th</sup> quantiles of flows of nano-Ag (tonnes)

|               |                          | United Kingdom |       |       | Greece  |       |       | Croatia |       |       |
|---------------|--------------------------|----------------|-------|-------|---------|-------|-------|---------|-------|-------|
| From          | To                       | Q25            | Mean  | Q75   | Q25     | Mean  | Q75   | Q25     | Mean  | Q75   |
| Import        | Manufacturing            | 0.041          | 0.239 | 0.305 | 0.002   | 0.009 | 0.013 | 0.002   | 0.006 | 0.008 |
| Import        | Consumption              | 0.000          | 0.000 | 0.000 | 0.047   | 0.189 | 0.261 | 0.011   | 0.045 | 0.062 |
| Production    | Manufacturing            | 0.267          | 0.599 | 0.849 | 0.013   | 0.053 | 0.062 | 0.012   | 0.052 | 0.062 |
| Production    | Wastewater               | 0.002          | 0.012 | 0.015 | 0.000   | 0.001 | 0.001 | 0.000   | 0.001 | 0.001 |
| Production    | Export                   | 0.000          | 0.000 | 0.000 | 0.000   | 0.000 | 0.000 | 0.000   | 0.000 | 0.000 |
| Manufacturing | Consumption              | 0.277          | 0.807 | 1.084 | 0.022   | 0.061 | 0.082 | 0.016   | 0.057 | 0.072 |
| Manufacturing | Wastewater               | 0.000          | 0.001 | 0.001 | 0.000   | 0.000 | 0.000 | 0.000   | 0.000 | 0.000 |
| Manufacturing | Recycling system         | 0.004          | 0.010 | 0.014 | 0.000   | 0.001 | 0.001 | 0.000   | 0.001 | 0.001 |
| Manufacturing | Export                   | 0.000          | 0.020 | 0.118 | 0.000   | 0.000 | 0.000 | 0.000   | 0.000 | 0.000 |
| Consumption   | Wastewater               | 0.012          | 0.039 | 0.051 | 0.003   | 0.012 | 0.016 | 0.001   | 0.005 | 0.006 |
| Consumption   | Air                      | 0.002          | 0.006 | 0.008 | 0.000   | 0.002 | 0.003 | 0.000   | 0.001 | 0.001 |
| Consumption   | Surface water            | 0.001          | 0.002 | 0.003 | 0.000   | 0.001 | 0.001 | 0.000   | 0.000 | 0.000 |
| Consumption   | Natural & urban soil     | 0.001          | 0.004 | 0.005 | 0.000   | 0.001 | 0.001 | 0.000   | 0.000 | 0.001 |
| Consumption   | Landfill                 | 0.034          | 0.101 | 0.134 | 0.015   | 0.059 | 0.079 | 0.015   | 0.056 | 0.073 |
| Consumption   | Waste incineration plant | 0.039          | 0.117 | 0.155 | 0.003   | 0.012 | 0.016 | 0.001   | 0.005 | 0.006 |
| Consumption   | Recycling system         | 0.184          | 0.539 | 0.723 | 0.044   | 0.163 | 0.223 | 0.009   | 0.035 | 0.046 |
| Wastewater    | WWTP                     | 0.017          | 0.050 | 0.067 | 0.003   | 0.013 | 0.017 | 0.001   | 0.006 | 0.007 |
| Wastewater    | Surface water            | 0.001          | 0.002 | 0.002 | 0.000   | 0.000 | 0.001 | 0.000   | 0.000 | 0.000 |
| WWTP          | Sludge                   | 0.013          | 0.042 | 0.055 | 0.003   | 0.011 | 0.014 | 0.001   | 0.005 | 0.006 |
| WWTP          | Surface water            | 0.001          | 0.008 | 0.008 | 0.000   | 0.002 | 0.002 | 0.000   | 0.001 | 0.001 |
| Sludge        | Sludge-treated soil      | 0.010          | 0.033 | 0.043 | 0.001   | 0.002 | 0.003 | 0.000   | 0.000 | 0.000 |
| Sludge        | Landfill                 | 0.001          | 0.000 | 0.001 | 0.002   | 0.004 | 0.007 | 0.001   | 0.005 | 0.006 |
| Sludge        | Waste incineration plant | 0.004          | 0.009 | 0.013 | 0.001   | 0.004 | 0.006 | 0.000   | 0.000 | 0.000 |
|               |                          | Hungary        |       |       | Ireland |       |       | Italy   |       |       |
| From          | To                       | Q25            | Mean  | Q75   | Q25     | Mean  | Q75   | Q25     | Mean  | Q75   |
| Import        | Manufacturing            | 0.004          | 0.013 | 0.019 | 0.035   | 0.134 | 0.193 | 0.169   | 0.644 | 0.912 |
| Import        | Consumption              | 0.026          | 0.108 | 0.147 | 0.000   | 0.000 | 0.000 | 0.000   | 0.000 | 0.000 |
| Production    | Manufacturing            | 0.015          | 0.052 | 0.063 | 0.032   | 0.052 | 0.068 | 0.048   | 0.052 | 0.054 |
| Production    | Wastewater               | 0.000          | 0.001 | 0.001 | 0.000   | 0.001 | 0.001 | 0.000   | 0.001 | 0.001 |
| Production    | Export                   | 0.000          | 0.000 | 0.000 | 0.000   | 0.000 | 0.000 | 0.000   | 0.000 | 0.000 |
| Manufacturing | Consumption              | 0.025          | 0.065 | 0.084 | 0.030   | 0.090 | 0.123 | 0.165   | 0.583 | 0.774 |
| Manufacturing | Wastewater               | 0.000          | 0.000 | 0.000 | 0.000   | 0.000 | 0.000 | 0.000   | 0.001 | 0.001 |
| Manufacturing | Recycling system         | 0.000          | 0.001 | 0.001 | 0.001   | 0.002 | 0.003 | 0.002   | 0.009 | 0.011 |
| Manufacturing | Export                   | 0.000          | 0.000 | 0.000 | 0.031   | 0.094 | 0.129 | 0.000   | 0.104 | 0.158 |
| Consumption   | Wastewater               | 0.002          | 0.008 | 0.011 | 0.001   | 0.004 | 0.006 | 0.007   | 0.028 | 0.036 |
| Consumption   | Air                      | 0.000          | 0.001 | 0.002 | 0.000   | 0.001 | 0.001 | 0.001   | 0.004 | 0.006 |
| Consumption   | Surface water            | 0.000          | 0.000 | 0.001 | 0.000   | 0.000 | 0.000 | 0.000   | 0.002 | 0.002 |
| Consumption   | Natural & urban soil     | 0.000          | 0.001 | 0.001 | 0.000   | 0.000 | 0.001 | 0.001   | 0.003 | 0.003 |
| Consumption   | Landfill                 | 0.012          | 0.041 | 0.054 | 0.004   | 0.013 | 0.017 | 0.022   | 0.079 | 0.105 |
| Consumption   | Waste incineration plant | 0.004          | 0.016 | 0.021 | 0.003   | 0.010 | 0.014 | 0.029   | 0.106 | 0.139 |
| Consumption   | Recycling system         | 0.031          | 0.104 | 0.139 | 0.020   | 0.061 | 0.084 | 0.101   | 0.362 | 0.479 |
| Wastewater    | WWTP                     | 0.003          | 0.009 | 0.012 | 0.002   | 0.005 | 0.007 | 0.008   | 0.029 | 0.038 |
| Wastewater    | Surface water            | 0.000          | 0.000 | 0.000 | 0.000   | 0.000 | 0.000 | 0.000   | 0.001 | 0.001 |
| WWTP          | Sludge                   | 0.002          | 0.008 | 0.010 | 0.001   | 0.005 | 0.006 | 0.007   | 0.024 | 0.032 |
| WWTP          | Surface water            | 0.000          | 0.001 | 0.001 | 0.000   | 0.001 | 0.001 | 0.001   | 0.004 | 0.005 |
| Sludge        | Sludge-treated soil      | 0.000          | 0.001 | 0.001 | 0.001   | 0.004 | 0.006 | 0.003   | 0.009 | 0.012 |
| Sludge        | Landfill                 | 0.001          | 0.001 | 0.002 | 0.000   | 0.000 | 0.000 | 0.005   | 0.014 | 0.019 |
| Sludge        | Waste incineration plant | 0.002          | 0.006 | 0.008 | 0.000   | 0.000 | 0.000 | 0.001   | 0.001 | 0.002 |

Table S15 (continued): 25<sup>th</sup> quantiles, means and 75<sup>th</sup> quantiles of flows of nano-Ag (tonnes)

|               |                          | Lithuania    |        |       | Luxemburg          |       |       | Latvia        |       |       |
|---------------|--------------------------|--------------|--------|-------|--------------------|-------|-------|---------------|-------|-------|
| From          | To                       | Q25          | Mean   | Q75   | Q25                | Mean  | Q75   | Q25           | Mean  | Q75   |
| Import        | Manufacturing            | 0.001        | 0.006  | 0.007 | 0.000              | 0.001 | 0.001 | 0.000         | 0.001 | 0.001 |
| Import        | Consumption              | 0.007        | 0.031  | 0.041 | 0.012              | 0.049 | 0.068 | 0.007         | 0.026 | 0.036 |
| Production    | Manufacturing            | 0.012        | 0.052  | 0.064 | 0.008              | 0.053 | 0.065 | 0.007         | 0.053 | 0.064 |
| Production    | Wastewater               | 0.000        | 0.001  | 0.001 | 0.000              | 0.001 | 0.001 | 0.000         | 0.001 | 0.001 |
| Production    | Export                   | 0.000        | 0.000  | 0.000 | 0.000              | 0.000 | 0.000 | 0.000         | 0.000 | 0.000 |
| Manufacturing | Consumption              | 0.016        | 0.057  | 0.072 | 0.012              | 0.053 | 0.069 | 0.010         | 0.052 | 0.065 |
| Manufacturing | Wastewater               | 0.000        | 0.000  | 0.000 | 0.000              | 0.000 | 0.000 | 0.000         | 0.000 | 0.000 |
| Manufacturing | Recycling system         | 0.000        | 0.001  | 0.001 | 0.000              | 0.001 | 0.001 | 0.000         | 0.001 | 0.001 |
| Manufacturing | Export                   | 0.000        | 0.000  | 0.000 | 0.000              | 0.000 | 0.000 | 0.000         | 0.000 | 0.000 |
| Consumption   | Wastewater               | 0.001        | 0.004  | 0.005 | 0.001              | 0.005 | 0.006 | 0.001         | 0.004 | 0.005 |
| Consumption   | Air                      | 0.000        | 0.001  | 0.001 | 0.000              | 0.001 | 0.001 | 0.000         | 0.001 | 0.001 |
| Consumption   | Surface water            | 0.000        | 0.000  | 0.000 | 0.000              | 0.000 | 0.000 | 0.000         | 0.000 | 0.000 |
| Consumption   | Natural & urban soil     | 0.000        | 0.000  | 0.000 | 0.000              | 0.000 | 0.001 | 0.000         | 0.000 | 0.000 |
| Consumption   | Landfill                 | 0.004        | 0.015  | 0.019 | 0.001              | 0.003 | 0.004 | 0.009         | 0.043 | 0.055 |
| Consumption   | Waste incineration plant | 0.001        | 0.004  | 0.005 | 0.004              | 0.019 | 0.025 | 0.001         | 0.004 | 0.005 |
| Consumption   | Recycling system         | 0.016        | 0.063  | 0.081 | 0.017              | 0.073 | 0.097 | 0.006         | 0.027 | 0.035 |
| Wastewater    | WWTP                     | 0.001        | 0.005  | 0.007 | 0.001              | 0.006 | 0.008 | 0.001         | 0.005 | 0.006 |
| Wastewater    | Surface water            | 0.000        | 0.000  | 0.000 | 0.000              | 0.000 | 0.000 | 0.000         | 0.000 | 0.000 |
| WWTP          | Sludge                   | 0.001        | 0.004  | 0.005 | 0.001              | 0.005 | 0.006 | 0.001         | 0.004 | 0.005 |
| WWTP          | Surface water            | 0.000        | 0.001  | 0.001 | 0.000              | 0.001 | 0.001 | 0.000         | 0.001 | 0.001 |
| Sludge        | Sludge-treated soil      | 0.001        | 0.004  | 0.005 | 0.001              | 0.004 | 0.005 | 0.001         | 0.004 | 0.005 |
| Sludge        | Landfill                 | 0.000        | 0.000  | 0.000 | 0.000              | 0.000 | 0.000 | 0.000         | 0.000 | 0.000 |
| Sludge        | Waste incineration plant | 0.000        | 0.000  | 0.000 | 0.000              | 0.001 | 0.001 | 0.000         | 0.000 | 0.000 |
|               |                          | <b>Malta</b> |        |       | <b>Netherlands</b> |       |       | <b>Norway</b> |       |       |
| From          | To                       | Q25          | Mean   | Q75   | Q25                | Mean  | Q75   | Q25           | Mean  | Q75   |
| Import        | Manufacturing            | 0.000        | 0.000  | 0.000 | 0.077              | 0.296 | 0.418 | 0.001         | 0.004 | 0.005 |
| Import        | Consumption              | 0.001        | 0.005  | 0.006 | 0.000              | 0.000 | 0.000 | 0.096         | 0.383 | 0.534 |
| Production    | Manufacturing            | 0.006        | 0.052  | 0.064 | 0.040              | 0.052 | 0.062 | 0.011         | 0.052 | 0.064 |
| Production    | Wastewater               | 0.000        | 0.001  | 0.001 | 0.000              | 0.001 | 0.001 | 0.000         | 0.001 | 0.001 |
| Production    | Export                   | 0.000        | 0.000  | 0.000 | 0.000              | 0.000 | 0.000 | 0.000         | 0.000 | 0.000 |
| Manufacturing | Consumption              | 0.011        | 0.051  | 0.063 | 0.072              | 0.233 | 0.311 | 0.018         | 0.056 | 0.079 |
| Manufacturing | Wastewater               | 0.000        | 0.000  | 0.000 | 0.000              | 0.000 | 0.000 | 0.000         | 0.000 | 0.000 |
| Manufacturing | Recycling system         | 0.000        | 0.001  | 0.001 | 0.001              | 0.004 | 0.006 | 0.000         | 0.001 | 0.001 |
| Manufacturing | Export                   | 0.000        | 0.000  | 0.000 | 0.040              | 0.130 | 0.173 | 0.000         | 0.000 | 0.000 |
| Consumption   | Wastewater               | 0.001        | 0.003  | 0.003 | 0.003              | 0.011 | 0.015 | 0.005         | 0.021 | 0.028 |
| Consumption   | Air                      | 0.000        | 0.000  | 0.001 | 0.001              | 0.002 | 0.002 | 0.001         | 0.003 | 0.004 |
| Consumption   | Surface water            | 0.000        | 0.000  | 0.000 | 0.000              | 0.001 | 0.001 | 0.000         | 0.001 | 0.002 |
| Consumption   | Natural & urban soil     | 0.000        | 0.0002 | 0.000 | 0.000              | 0.001 | 0.001 | 0.000         | 0.002 | 0.003 |
| Consumption   | Landfill                 | 0.005        | 0.026  | 0.032 | 0.000              | 0.001 | 0.002 | 0.000         | 0.002 | 0.003 |
| Consumption   | Waste incineration plant | 0.001        | 0.003  | 0.003 | 0.026              | 0.088 | 0.116 | 0.022         | 0.088 | 0.120 |
| Consumption   | Recycling system         | 0.005        | 0.024  | 0.029 | 0.040              | 0.130 | 0.173 | 0.083         | 0.321 | 0.447 |
| Wastewater    | WWTP                     | 0.001        | 0.004  | 0.004 | 0.004              | 0.012 | 0.016 | 0.005         | 0.022 | 0.029 |
| Wastewater    | Surface water            | 0.000        | 0.000  | 0.000 | 0.000              | 0.000 | 0.001 | 0.000         | 0.001 | 0.001 |
| WWTP          | Sludge                   | 0.001        | 0.003  | 0.004 | 0.003              | 0.010 | 0.014 | 0.004         | 0.018 | 0.024 |
| WWTP          | Surface water            | 0.000        | 0.001  | 0.001 | 0.000              | 0.002 | 0.002 | 0.000         | 0.003 | 0.003 |
| Sludge        | Sludge-treated soil      | 0.000        | 0.000  | 0.000 | 0.000              | 0.000 | 0.000 | 0.003         | 0.015 | 0.020 |
| Sludge        | Landfill                 | 0.001        | 0.003  | 0.004 | 0.000              | 0.000 | 0.000 | 0.001         | 0.003 | 0.004 |
| Sludge        | Waste incineration plant | 0.001        | 0.002  | 0.003 | 0.004              | 0.010 | 0.014 | 0.000         | 0.000 | 0.000 |

Table S15 (continued): 25<sup>th</sup> quantiles, means and 75<sup>th</sup> quantiles of flows of nano-Ag (tonnes)

|               |                          | Poland   |       |       | Portugal |       |       | Romania |       |       |
|---------------|--------------------------|----------|-------|-------|----------|-------|-------|---------|-------|-------|
| From          | To                       | Q25      | Mean  | Q75   | Q25      | Mean  | Q75   | Q25     | Mean  | Q75   |
| Import        | Manufacturing            | 0.000    | 0.000 | 0.000 | 0.002    | 0.013 | 0.016 | 0.001   | 0.011 | 0.013 |
| Import        | Consumption              | 0.091    | 0.384 | 0.520 | 0.041    | 0.167 | 0.229 | 0.038   | 0.155 | 0.213 |
| Production    | Manufacturing            | 0.019    | 0.077 | 0.107 | 0.016    | 0.052 | 0.067 | 0.015   | 0.052 | 0.066 |
| Production    | Wastewater               | 0.003    | 0.017 | 0.021 | 0.000    | 0.001 | 0.001 | 0.000   | 0.001 | 0.001 |
| Production    | Export                   | 0.196    | 0.780 | 1.077 | 0.000    | 0.000 | 0.000 | 0.000   | 0.000 | 0.000 |
| Manufacturing | Consumption              | 0.023    | 0.076 | 0.113 | 0.026    | 0.065 | 0.087 | 0.023   | 0.062 | 0.083 |
| Manufacturing | Wastewater               | 0.000    | 0.000 | 0.000 | 0.000    | 0.000 | 0.000 | 0.000   | 0.000 | 0.000 |
| Manufacturing | Recycling system         | 0.000    | 0.001 | 0.001 | 0.000    | 0.001 | 0.001 | 0.000   | 0.001 | 0.001 |
| Manufacturing | Export                   | 0.000    | 0.000 | 0.000 | 0.000    | 0.000 | 0.000 | 0.000   | 0.000 | 0.000 |
| Consumption   | Wastewater               | 0.005    | 0.022 | 0.029 | 0.003    | 0.011 | 0.015 | 0.003   | 0.010 | 0.014 |
| Consumption   | Air                      | 0.001    | 0.004 | 0.005 | 0.000    | 0.002 | 0.002 | 0.000   | 0.002 | 0.002 |
| Consumption   | Surface water            | 0.000    | 0.001 | 0.002 | 0.000    | 0.001 | 0.001 | 0.000   | 0.001 | 0.001 |
| Consumption   | Natural & urban soil     | 0.000    | 0.002 | 0.003 | 0.000    | 0.001 | 0.001 | 0.000   | 0.001 | 0.001 |
| Consumption   | Landfill                 | 0.025    | 0.108 | 0.144 | 0.013    | 0.049 | 0.065 | 0.048   | 0.173 | 0.234 |
| Consumption   | Waste incineration plant | 0.012    | 0.053 | 0.071 | 0.009    | 0.032 | 0.042 | 0.003   | 0.012 | 0.016 |
| Consumption   | Recycling system         | 0.066    | 0.270 | 0.369 | 0.039    | 0.137 | 0.186 | 0.005   | 0.019 | 0.026 |
| Wastewater    | WWTP                     | 0.009    | 0.038 | 0.052 | 0.003    | 0.012 | 0.016 | 0.003   | 0.011 | 0.015 |
| Wastewater    | Surface water            | 0.000    | 0.001 | 0.002 | 0.000    | 0.000 | 0.001 | 0.000   | 0.000 | 0.000 |
| WWTP          | Sludge                   | 0.007    | 0.032 | 0.043 | 0.003    | 0.010 | 0.013 | 0.002   | 0.009 | 0.012 |
| WWTP          | Surface water            | 0.001    | 0.006 | 0.006 | 0.000    | 0.002 | 0.002 | 0.000   | 0.002 | 0.002 |
| Sludge        | Sludge-treated soil      | 0.003    | 0.016 | 0.021 | 0.002    | 0.009 | 0.012 | 0.000   | 0.001 | 0.001 |
| Sludge        | Landfill                 | 0.002    | 0.005 | 0.008 | 0.001    | 0.001 | 0.002 | 0.003   | 0.009 | 0.013 |
| Sludge        | Waste incineration plant | 0.004    | 0.012 | 0.019 | 0.000    | 0.000 | 0.001 | 0.000   | 0.000 | 0.000 |
|               |                          | Slovakia |       |       | Slovenia |       |       | Sweden  |       |       |
| From          | To                       | Q25      | Mean  | Q75   | Q25      | Mean  | Q75   | Q25     | Mean  | Q75   |
| Import        | Manufacturing            | 0.000    | 0.002 | 0.002 | 0.000    | 0.001 | 0.001 | 0.001   | 0.006 | 0.007 |
| Import        | Consumption              | 0.021    | 0.083 | 0.114 | 0.010    | 0.041 | 0.056 | 0.111   | 0.444 | 0.612 |
| Production    | Manufacturing            | 0.008    | 0.052 | 0.064 | 0.007    | 0.052 | 0.064 | 0.012   | 0.053 | 0.065 |
| Production    | Wastewater               | 0.000    | 0.001 | 0.001 | 0.000    | 0.001 | 0.001 | 0.000   | 0.001 | 0.001 |
| Production    | Export                   | 0.000    | 0.000 | 0.000 | 0.000    | 0.000 | 0.000 | 0.000   | 0.000 | 0.000 |
| Manufacturing | Consumption              | 0.014    | 0.053 | 0.071 | 0.011    | 0.052 | 0.066 | 0.019   | 0.057 | 0.081 |
| Manufacturing | Wastewater               | 0.000    | 0.000 | 0.000 | 0.000    | 0.000 | 0.000 | 0.000   | 0.000 | 0.000 |
| Manufacturing | Recycling system         | 0.000    | 0.001 | 0.001 | 0.000    | 0.001 | 0.001 | 0.000   | 0.001 | 0.001 |
| Manufacturing | Export                   | 0.000    | 0.000 | 0.000 | 0.000    | 0.000 | 0.000 | 0.000   | 0.000 | 0.000 |
| Consumption   | Wastewater               | 0.001    | 0.007 | 0.009 | 0.001    | 0.004 | 0.006 | 0.006   | 0.024 | 0.032 |
| Consumption   | Air                      | 0.000    | 0.001 | 0.001 | 0.000    | 0.001 | 0.001 | 0.001   | 0.004 | 0.005 |
| Consumption   | Surface water            | 0.000    | 0.000 | 0.000 | 0.000    | 0.000 | 0.000 | 0.000   | 0.001 | 0.002 |
| Consumption   | Natural & urban soil     | 0.000    | 0.001 | 0.001 | 0.000    | 0.000 | 0.001 | 0.000   | 0.002 | 0.003 |
| Consumption   | Landfill                 | 0.016    | 0.064 | 0.086 | 0.005    | 0.023 | 0.029 | 0.000   | 0.001 | 0.001 |
| Consumption   | Waste incineration plant | 0.004    | 0.017 | 0.023 | 0.001    | 0.005 | 0.006 | 0.025   | 0.105 | 0.140 |
| Consumption   | Recycling system         | 0.011    | 0.047 | 0.063 | 0.013    | 0.060 | 0.079 | 0.094   | 0.364 | 0.501 |
| Wastewater    | WWTP                     | 0.002    | 0.007 | 0.010 | 0.001    | 0.005 | 0.007 | 0.006   | 0.024 | 0.033 |
| Wastewater    | Surface water            | 0.000    | 0.000 | 0.000 | 0.000    | 0.000 | 0.000 | 0.000   | 0.001 | 0.001 |
| WWTP          | Sludge                   | 0.001    | 0.006 | 0.008 | 0.001    | 0.005 | 0.006 | 0.005   | 0.021 | 0.027 |
| WWTP          | Surface water            | 0.000    | 0.001 | 0.001 | 0.000    | 0.001 | 0.001 | 0.000   | 0.004 | 0.004 |
| Sludge        | Sludge-treated soil      | 0.000    | 0.000 | 0.000 | 0.000    | 0.000 | 0.000 | 0.004   | 0.018 | 0.024 |
| Sludge        | Landfill                 | 0.001    | 0.001 | 0.002 | 0.000    | 0.000 | 0.000 | 0.000   | 0.001 | 0.002 |
| Sludge        | Waste incineration plant | 0.001    | 0.005 | 0.007 | 0.001    | 0.004 | 0.006 | 0.001   | 0.001 | 0.004 |



Table S16: Normalised releases to surface water. Values are in tonnes / km<sup>2</sup> of surface water (freshwater and a band of 10 m along the coastlines).

| <b>Country</b> | <b>Nano-TiO<sub>2</sub></b> | <b>Nano-ZnO</b> | <b>Nano-Ag</b> |
|----------------|-----------------------------|-----------------|----------------|
| Austria        | 1.2E-01                     | 2.5E-02         | 3.42E-06       |
| Belgium        | 5.7E-01                     | 1.1E-01         | 1.57E-05       |
| Bulgaria       | 5.8E-02                     | 9.2E-03         | 8.76E-07       |
| Switzerland    | 1.0E-01                     | 2.1E-02         | 2.03E-06       |
| Cyprus         | 7.0E-01                     | 1.5E-01         | 2.05E-05       |
| Czech Republic | 1.8E-01                     | 3.5E-02         | 2.76E-06       |
| Germany        | 1.6E-01                     | 3.0E-02         | 2.91E-06       |
| Denmark        | 1.6E-01                     | 2.9E-02         | 7.21E-06       |
| Spain          | 3.1E-01                     | 6.5E-02         | 3.23E-06       |
| Estonia        | 7.5E-03                     | 1.3E-03         | 3.49E-07       |
| Finland        | 2.5E-03                     | 5.4E-04         | 1.46E-07       |
| France         | 2.0E-01                     | 3.6E-02         | 3.59E-06       |
| United Kingdom | 3.7E-01                     | 7.0E-02         | 2.84E-06       |
| Greece         | 1.4E-01                     | 2.7E-02         | 1.73E-06       |
| Croatia        | 1.1E-01                     | 2.0E-02         | 1.46E-06       |
| Hungary        | 5.2E-02                     | 8.3E-03         | 5.13E-07       |
| Ireland        | 4.6E-02                     | 7.6E-03         | 5.85E-07       |
| Italy          | 2.9E-01                     | 5.6E-02         | 1.25E-06       |
| Lithuania      | 2.8E-02                     | 4.7E-03         | 7.57E-07       |
| Luxembourg     | 1.8E+00                     | 3.4E-01         | 1.25E-04       |
| Latvia         | 1.8E-02                     | 3.2E-03         | 6.95E-07       |
| Malta          | 2.1E+00                     | 3.9E-01         | 1.34E-04       |
| Netherlands    | 7.4E-02                     | 1.5E-02         | 7.70E-07       |
| Norway         | 6.8E-03                     | 1.2E-03         | 2.49E-07       |
| Poland         | 1.0E-01                     | 1.7E-02         | 1.51E-06       |
| Portugal       | 1.9E-01                     | 3.6E-02         | 2.42E-06       |
| Romania        | 3.6E-02                     | 5.1E-03         | 8.28E-07       |
| Slovakia       | 3.0E-01                     | 5.8E-02         | 1.80E-06       |
| Slovenia       | 1.4E-01                     | 4.6E-02         | 6.35E-06       |
| Sweden         | 4.0E-03                     | 7.6E-04         | 1.49E-07       |

Table S17: Normalised releases to soils. Values are in tonnes / km<sup>2</sup> of soil

| <b>Country</b> | <b>Nano-TiO<sub>2</sub></b> | <b>Nano-ZnO</b> | <b>Nano-Ag</b> |
|----------------|-----------------------------|-----------------|----------------|
| Austria        | 1.1E-03                     | 2.3E-04         | 7.27E-08       |
| Belgium        | 2.3E-03                     | 4.9E-04         | 1.99E-07       |
| Bulgaria       | 7.8E-04                     | 1.2E-04         | 2.73E-08       |
| Switzerland    | 2.9E-05                     | 3.4E-05         | 2.01E-08       |
| Cyprus         | 7.5E-03                     | 1.5E-03         | 4.34E-07       |
| Czech Republic | 3.9E-03                     | 7.6E-04         | 1.16E-07       |
| Germany        | 1.8E-03                     | 3.6E-04         | 7.67E-08       |
| Denmark        | 3.6E-03                     | 6.5E-04         | 2.35E-07       |
| Spain          | 4.7E-03                     | 9.5E-04         | 9.72E-08       |
| Estonia        | 1.0E-04                     | 2.0E-05         | 1.65E-08       |
| Finland        | 8.4E-05                     | 2.0E-05         | 1.32E-08       |
| France         | 3.7E-03                     | 6.6E-04         | 1.35E-07       |
| United Kingdom | 1.0E-02                     | 1.9E-03         | 1.52E-07       |
| Greece         | 8.2E-04                     | 1.7E-04         | 2.30E-08       |
| Croatia        | 1.4E-04                     | 3.3E-05         | 1.25E-08       |
| Hungary        | 3.1E-04                     | 5.1E-05         | 2.20E-08       |
| Ireland        | 2.3E-03                     | 3.7E-04         | 7.25E-08       |
| Italy          | 4.3E-03                     | 8.5E-04         | 4.06E-08       |
| Lithuania      | 1.1E-03                     | 1.9E-04         | 6.24E-08       |
| Luxembourg     | 9.4E-03                     | 1.8E-03         | 1.55E-06       |
| Latvia         | 8.0E-04                     | 1.4E-04         | 6.24E-08       |
| Malta          | 3.0E-04                     | 3.4E-04         | 9.65E-07       |
| Netherlands    | 6.4E-05                     | 6.5E-05         | 2.95E-08       |
| Norway         | 7.4E-04                     | 1.4E-04         | 5.59E-08       |
| Poland         | 1.7E-03                     | 2.9E-04         | 5.83E-08       |
| Portugal       | 4.7E-03                     | 8.9E-04         | 1.14E-07       |
| Romania        | 9.4E-05                     | 1.6E-05         | 8.49E-09       |
| Slovakia       | 2.5E-05                     | 3.0E-05         | 2.06E-08       |
| Slovenia       | 3.7E-05                     | 2.5E-05         | 2.49E-08       |
| Sweden         | 7.1E-04                     | 1.3E-04         | 4.88E-08       |

## Product allocation for nano-Ag

Table S18: Comparison between product allocation in this study and two other studies

| Country                                       | Sun et al. 2016 <sup>6</sup> | Giese et al. 2018 <sup>7</sup> | This study |
|-----------------------------------------------|------------------------------|--------------------------------|------------|
| Textiles                                      | 25%                          | 31%                            | 2.4%       |
| Cleaning agents                               | 6%                           | 1%                             | 0.2%       |
| Paints                                        | 3%                           |                                |            |
| Consumer electronics /<br>Electronic printing | 38%                          | 65%                            | 80%        |
| Cosmetics                                     | 10%                          | 0%                             | 2.6%       |
| Medical technology                            | 4%                           | 1%                             | 9.3%       |
| Plastics                                      | 3%                           | 1%                             |            |
| Food                                          | 7%                           | 0%                             | 0.2%       |
| Glass and ceramics                            | 1%                           |                                |            |
| Metals                                        | 2%                           | 0.5%*                          |            |
| Soil remediation                              | 1%                           |                                |            |
| Filters                                       |                              | 0.5%*                          | 0.2%       |
| Coatings                                      |                              | 1%                             | 4.9%       |

\* in the original reference presented as Other (incl. metals, filters, ...) accounting for 1%, for comparison in this table presented as metals and filters with each 0.5% contribution.

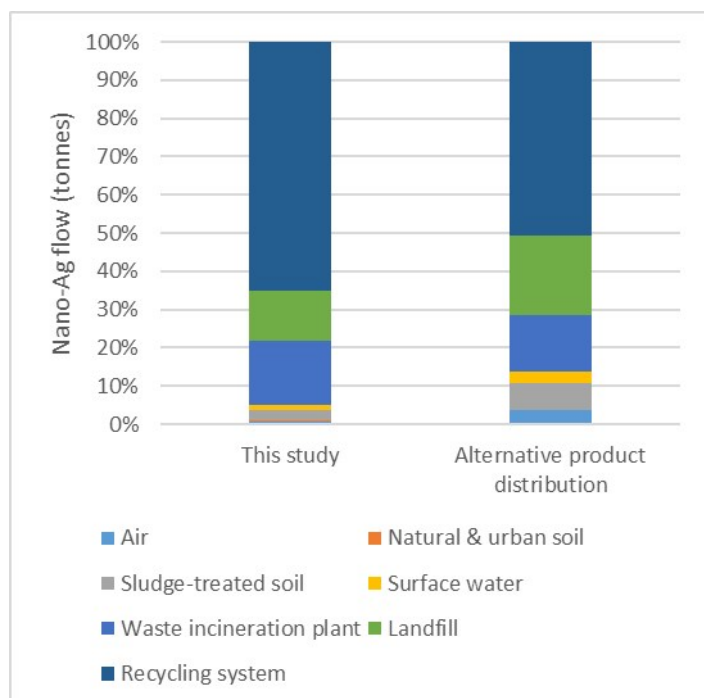

Figure S1 Modelled results of nano-Ag using the product distribution presented in this study and the product distribution presented by Giese et al. (2018)<sup>7</sup>



## References

- 1 Eurostat, Sewage sludge production and disposal from urban wastewater.
- 2 Eurostat, Freshwater and total land cover.
- 3 C. Steinmeier, *CORINE land cover 2000 / 2006 - Switzerland - Final Report*, 2013.
- 4 L. Klein, *Habitat fragmentation due to transportation, Estonia*, 2016.
- 5 Worldatlas, Worldatlas, <https://www.worldatlas.com/webimage/countrys/europe/no.htm>, (accessed 13 May 2019).
- 6 T. Y. Sun, N. A. Bornhöft, K. Hungerbühler and B. Nowack, Dynamic Probabilistic Modeling of Environmental Emissions of Engineered Nanomaterials, *Environ. Sci. Technol.*, 2016, **50**, 4701–4711.
- 7 B. Giese, F. Klaessig, B. Park, R. Kaegi, M. Steinfeldt, H. Wigger, A. Von Gleich and F. Gottschalk, Risks, Release and Concentrations of Engineered Nanomaterial in the Environment, *Sci. Rep.*, 2018, **8**, 1–18.
